# Supplementary material for: Piezo1 ion channels inherently function as independent mechanotransducers
Source: eLife. 2021 Oct 29;10:e70988. doi: 10.7554/eLife.70988 (PMC8555984; doi:10.7554/eLife.70988)
Supplement: Figure 1—figure supplement 1—source data 1. — HUVEC, human umbilical vein endothelial cell. [file elife-70988-fig1-figsupp1-data1.xlsx]

## Sheet: Figure 1- figure supplement 1C
Number of Channels	Counts
0	16
1	1
2	2
3	0
4	2
5	0
6	0
7	0
8	0
9	0
10	0
11	0
12	0
13	0
14	0
15	0
16	0
17	0
18	0
19	0
20	0
