# Supplementary material for: Piezo1 ion channels inherently function as independent mechanotransducers
Source: eLife. 2021 Oct 29;10:e70988. doi: 10.7554/eLife.70988 (PMC8555984; doi:10.7554/eLife.70988)
Supplement: Figure 1—figure supplement 2—source data 1. [file elife-70988-fig1-figsupp2-data1.xlsx]

## Sheet: Figure 1- figure supplement 2B
		Counts
	Current (pA)	Ramp peak	Step peak	Step peak (0 channels)
	-0.48 to 0.48	41	2	2
	0.48 to 1.46	44	6	5
	1.46 to 2.44	40	16	10
	2.44 to 3.42	44	26	14
	3.42 to 4.39	32	30	5
	4.39 to 5.37	22	45	2
	5.37 to 6.35	11	34	1
	6.35 to 7.32	13	30	0
	7.32 to 8.30	15	20	0
	8.30 to 9.27	5	14	0
	9.27 to 10.3	5	9	0
	10.3 to 11.2	1	13	0
	11.2 to 12.2	3	10	0
	12.2 to 13.2	3	10	0
	13.2 to 14.2	0	4	0
	14.2 to 15.2	1	3	0
	15.1 to 16.1	0	4	0
	16.1 to 17.1	0	3	0
	17.1 to 18.1	0	1	0
	18.1 to 19	0	1	0
	19 to 20	0	0	0
	20 to 21	0	1	0

## Sheet: Figure 1- figure supplement 2C
	Fraction of Patches
Current (pA)	N2A-p1ko	wtN2A (0 channels)
-0.48 to 0.48	0	0.0512821
0.48 to 1.46	0	0.128205
1.46 to 2.44	0.0666667	0.25641
2.44 to 3.42	0.4	0.358974
3.42 to 4.39	0.266667	0.128205
4.39 to 5.37	0.2	0.0512821
5.37 to 6.35	0	0.025641
6.35 to 7.32	0	0
7.32 to 8.30	0.0666667	0

## Sheet: Figure 1- figure supplement 2D
SS current	Count
0.7 to 0.75	0
0.75 to 0.8	1
0.8 to 0.85	8
0.85 to 0.9	9
0.9 to 0.95	73
0.95 to 1	132
1 to 1.05	46
1.05 to 1.1	6
1.1 to 1.15	2
1.15 to 1.2	2

## Sheet: Figure 1- figure supplement 2E
	Peak current as a function of pipette resistance
pipette resistance (Mohm)	2 to 2.5	2.5 to 3	3 to 3.5	3.5 to 4	4 to 4.5	4.5 to 5	5 to 5.5	5.5 to 6	6 to 6.5
	2.09e-11	1.97e-11	3.03e-12	2.53e-12	2.9e-12	3.67e-12	5.98e-12	1.93e-12	7.5e-12
	1.94e-11	1.15e-12	7.7e-12	2.23e-12	3.99e-12	3.26e-12	0	4.55e-12	8.94e-13
	1.73e-11	1.26e-11	4.56e-12	6.05e-12	0	2.46e-12	1.14e-12	1.14e-12	4.56e-12
	1.35e-11	8.8e-12	9.1e-12	7.46e-12	1.8e-12	4.97e-12	0	8.23e-13	1.99e-12
	2.45e-11	9.39e-12	1.93e-12	3.94e-12	3.9e-12	7.85e-13	1.71e-12	0	6.39e-12
	9.7e-12	2.83e-12	4.89e-12	1.07e-12	3.34e-12	3.11e-12	4.02e-12	8.05e-13	8.69e-13
	8.57e-12	3.66e-12	2.74e-12	4.12e-12	2.53e-12	8.3e-13	0	0
		1.57e-11	6.62e-12	3.86e-12	1.99e-12	9.88e-12	2.64e-12	5.28e-12
		9.69e-12	5.95e-12	4.24e-12	8.15e-12	9.63e-12	0	4.52e-12
		8.67e-12	0	1.29e-11	8.21e-12	8.21e-12	2.35e-12	3.68e-12
		1.2e-11	3.63e-12	8.83e-12	0	4.91e-12	0	3.83e-12
		4.45e-12	9.99e-12	2.4e-12	7.53e-12	4.17e-12	1.88e-12	0
		3.89e-11	2.82e-12	1.26e-11	1.89e-12	0	3.63e-12	3.86e-12
		4.18e-12	4.54e-12	8.56e-13	1.96e-12	1.5e-12	1.92e-12	3.16e-12
			7.4e-12	4.15e-12	2.53e-12	7.02e-12	0	0
			7.42e-12	2.68e-12	8.26e-12	1.62e-12	2.38e-12
			1.28e-12	2.86e-12	1.51e-12	2.13e-12	1.37e-12
			7.57e-12	6.92e-12	4.48e-12	1.38e-12	2.18e-12
			5.04e-12	0	4.52e-12	0	7.14e-12
			5.91e-12	5.2e-13	0	1.8e-12	3.63e-12
			3.28e-12	1.08e-11	9.91e-13	0	7.3e-13
			9.67e-13	4.66e-12	6.64e-12	7.08e-12	9.9e-13
			8.93e-12	4.62e-13	9.12e-13	9.28e-12	5.82e-12
			2.56e-12	2.32e-12	9.22e-12	0	9.44e-13
			0	9.06e-13	1.41e-12	7.24e-12	1.11e-12
			0	1.17e-11	1.06e-12	0	1.12e-12
			4.43e-12	1.8e-12	2.42e-12	3.41e-12	1.98e-12
			5.13e-12	4.79e-12	1.44e-12	1.94e-12	0
			1.83e-12	0	1.57e-12	3.44e-12	1.59e-12
			4.11e-12	1.74e-12	8.73e-13	0	0
			0	5.82e-12	6.93e-12	1.82e-12	7.88e-13
			1.2e-11	3.57e-12	3.4e-12	3.31e-12	1.22e-11
			5.86e-12	1.07e-12	4.53e-12	3.39e-12	8.45e-13
			2.02e-12	1.72e-12	4.15e-12	5.02e-12	1.69e-12
			1.01e-12	5.81e-12	0	3.27e-12	0
			1.39e-12	3.04e-12	4.02e-12	2.74e-12	3.92e-12
			7.16e-12	8.1e-12	3.81e-12	0	3.55e-12
			5.65e-12	1.2e-12	2.32e-12	8.35e-13	2.77e-12
			2.8e-12	4.54e-12	1.36e-12	0	4.17e-12
			2.94e-12	1.59e-12	0	6.17e-13	1.7e-12
			4.65e-12	1.24e-11	1.2e-12	2.92e-12
			6.44e-12	3.09e-12	8.11e-12	2.55e-12
			3.36e-12	0	2.91e-12	7.55e-12
				6e-12	3.08e-12	2.94e-12
				3.32e-12	9.9e-13	2.21e-12
				3.45e-12	3.14e-12	4.48e-12
				9.52e-12	1.05e-12	2.09e-12
				9.94e-13	4.3e-12	2.76e-12
					3.29e-12	1.44e-11
					8.98e-12	2.77e-12
					0	3.42e-12
					4.51e-12	0
					0	0
					9.74e-13	2.3e-12
					6.79e-12	3.35e-12
					3.38e-12	3.81e-12
					3.47e-12	3.43e-12
					2.74e-12	9.07e-13
					6.38e-12
					3.41e-12
					0
					2.4e-12
					8.09e-12
					1.3e-12
					0
					1.08e-12
					0
					4.2e-12
					2.55e-12
					1.77e-11

## Sheet: Figure 1- figure supplement 2F
	Counts
Current (pA)	acute	overnight
-0.48 to 0.48	3	2
0.48 to 1.46	4	11
1.46 to 2.44	8	2
2.44 to 3.42	4	6
3.42 to 4.39	2	3
4.39 to 5.37	2	3
5.37 to 6.35	1	0
6.35 to 7.32	0	0
7.32 to 8.30	2	0
8.30 to 9.27	0	1
9.27 to 10.3	0	0

## Sheet: Figure 1- figure supplement 2G
Single channel current (pA)	counts
0.4 to 0.5	1
0.5 to 0.6	1
0.6 to 0.7	1
0.7 to 0.8	2
0.8 to 0.9	7
0.9 to 1.0	10
1.0 to 1.1	4
1.1 to 1.2	3
1.2 to 1.3	3
1.3 to 1.4	1
1.4 to 1.5	2

## Sheet: Figure 1- figure supplement 2I
Imax first protocol	Imax second protocol
1.29e-11	1.48e-11
5.86e-12	4.85e-12
3.04e-12	3.15e-12
6.44e-12	6.63e-12
5.81e-12	7.91e-12
7.42e-12	1.03e-11
7.4e-12	4.45e-12
4.3e-12	4.52e-12
1.38e-12	3.2e-12
7.57e-12	5.91e-12
4.52e-12	5.76e-12
1.99e-12	2.25e-12
4.89e-12	4.63e-12
5.82e-12	6.6e-12
1.93e-12	2.2e-12
3.9e-12	3.76e-12
0	0
9.67e-13	1.04e-12
2.74e-12	3.83e-12
8.21e-12	3.35e-12
3.14e-12	3.14e-12
2.23e-12	3.09e-12
3.03e-12	2.55e-12
6.38e-12	7.05e-12
5.95e-12	5.7e-12
4.12e-12	4.97e-12
4.65e-12	5.94e-12
8.09e-12	8.74e-12
8.11e-12	8.8e-12
3.27e-12	3.6e-12
5.02e-12	5.1e-12
1.28e-12	3.25e-12
1.2e-11	1.17e-11
5.04e-12	5.8e-12
9.1e-12	8.98e-12
0	0
2.32e-12	2.13e-12
4.51e-12	4.7e-12
4.02e-12	3.53e-12
2.3e-12	1.84e-12
2.8e-12	3.35e-12
0	0
3.29e-12	4.3e-12
6.62e-12	6.28e-12
4.54e-12	5.44e-12
1.26e-11	1.27e-11
1.51e-12	9.48e-13
1.2e-12	1.34e-12
8.98e-12	8.36e-12
0	0
0	0
8.15e-12	7.97e-12
4.97e-12	5.06e-12
1.41e-12	1.47e-12
1.14e-12	1.19e-12
4.48e-12	6.41e-12
0	0
0	0
3.36e-12	2.49e-12
2.94e-12	3.01e-12
0	0
3.28e-12	3.36e-12
7.16e-12	6.16e-12
4.54e-12	5.45e-12
6.92e-12	8.56e-12
4.17e-12	4.03e-12
5.98e-12	5.82e-12
1.22e-11	1.3e-11
7.46e-12	7.15e-12
1.24e-11	1.31e-11
4.24e-12	4.03e-12
0	0
3.67e-12	3.51e-12
1.08e-11	1.24e-11
8.26e-12	9.5e-12
1.59e-12	2.07e-12
2.91e-12	3.01e-12
0	0
3.35e-12	7.15e-12
5.82e-12	3.9e-12
2.02e-12	2.33e-12
4.11e-12	4.68e-12
2.74e-12	4.12e-12
7.14e-12	6.42e-12
2.35e-12	2.75e-12
2.77e-12	3.17e-12
4.02e-12	4.73e-12
1.7e-12	1.9e-12
9.28e-12	9.87e-12
9.88e-12	5.09e-12
1.82e-12	1.99e-12
0	0
7.55e-12	7.75e-12
2.32e-12	1.91e-12
1.77e-11	2.34e-11
9.12e-13	2.32e-12
9.63e-12	9.29e-12
3.34e-12	3.69e-12
8.05e-13	8.1e-13
1.98e-12	1.74e-12
9.9e-13	9.23e-13
9.44e-13	9.79e-13
3.31e-12	3.13e-12
1.57e-12	1.47e-12
4.53e-12	4.88e-12
3.47e-12	2.82e-12
3.41e-12	3.93e-12
2.92e-12	3.74e-12
1.62e-12	1.84e-12
0	0
0	0
1.5e-12	1.32e-12
4.62e-13	0
3.63e-12	6.58e-12
7.5e-12	6.76e-12
6.17e-13	9.67e-13
0	0
2.18e-12	1.78e-12
2.53e-12	2.13e-12
0	0
2.09e-12	2.66e-12
2.38e-12	2.78e-12
4.66e-12	2.44e-12
1.8e-12	2.27e-12
4.15e-12	4.39e-12
0	0
8.3e-13	8.76e-13
2.77e-12	1.71e-12
0	0
2.9e-12	3.04e-12
8.1e-12	8.47e-12
5.91e-12	6.74e-12
7.53e-12	7.68e-12
9.74e-13	1.08e-12
2.56e-12	1.02e-12
1.72e-12	1.67e-12
1.39e-12	1.38e-12
3.4e-12	4.92e-12
9.91e-13	1.04e-12
1.36e-12	1.81e-12
3.63e-12	4.03e-12
8.23e-13	2.18e-12
8.83e-12	5.6e-12
2.4e-12	1.92e-12
7.88e-13	1.02e-12
1.69e-12	1.5e-12
1.92e-12	3.47e-12
1.88e-12	2.17e-12
0	0
4.17e-12	4.43e-12
2.53e-12	2.73e-12
1.71e-12	1.96e-12
0	0
2.94e-12	3.18e-12
1.94e-12	3.11e-12
7.24e-12	9.44e-12
0	0
2.55e-12	3.68e-12
9.9e-13	1.1e-12
3.39e-12	2.54e-12
1.89e-12	0
4.79e-12	3.4e-12
6.79e-12	6.2e-12
3.38e-12	4.39e-12
1.3e-12	1.11e-12
0	0
1.2e-12	1.21e-12
1.44e-12	1.24e-12
0	0
5.13e-12	6.89e-12
4.56e-12	5.13e-12
0	0
1.07e-12	1.31e-12
3.57e-12	3.38e-12
3.92e-12	4.13e-12
0	0
1.83e-12	2.13e-12
1.96e-12	2.31e-12
0	0
3.44e-12	3.62e-12
3.99e-12	4.3e-12
3.32e-12	3.33e-12
2.42e-12	2.19e-12
0	0
5.28e-12	6.35e-12
0	0
3.68e-12	4.6e-12
6e-12	5.7e-12
3.83e-12	4.29e-12
3.16e-12	2.83e-12
0	0
3.86e-12	4.67e-12
1.12e-12	1.24e-12
2.74e-12	2.79e-12
9.07e-13	2.24e-12
1.44e-11	7.35e-12
0	0
2.13e-12	2.04e-12
7.7e-12	7.59e-12
4.43e-12	3.47e-12
3.63e-12	3.36e-12
5.74e-12	6.05e-12
6.39e-12	5.67e-12
0	0
8.21e-12	9.44e-12
0	0
5.65e-12	7.39e-12
4.91e-12	5.08e-12
3.42e-12	4.25e-12
2.21e-12	1.68e-12
3.26e-12	3.26e-12
8.35e-13	8.6e-13
2.53e-12	2.71e-12
9.94e-13	8.62e-13
4.56e-12	2.43e-12
1.01e-12	2.49e-12
1.05e-12	9.08e-13
1.17e-11	1.25e-11
0	0
1.06e-12	1.09e-12
3.45e-12	3.55e-12
6.64e-12	8.06e-12
6.05e-12	6.31e-12
8.56e-13	1.59e-12
7.02e-12	8.23e-12
8.93e-12	1.02e-11
0	0
1.59e-12	1.78e-12
2.55e-12	2.27e-12
6.93e-12	7.12e-12
1.74e-12	3.1e-12
4.15e-12	3.12e-12
3.94e-12	4.12e-12
7.08e-12	7.93e-12
2.4e-12	1.7e-12
0	0
0	0
2.68e-12	1.68e-12
0	0
1.08e-12	6.17e-13
3.81e-12	4.27e-12
9.06e-13	0
1.8e-12	1.56e-12
8.94e-13	1.28e-12
5.2e-13	1.38e-12
3.08e-12	3.84e-12
3.81e-12	5.82e-12
1.14e-12	1.1e-12
9.22e-12	9.11e-12
2.86e-12	1.29e-12
7.3e-13	1.16e-12
2.64e-12	3.4e-12
4.48e-12	3.51e-12
4.55e-12	4.29e-12
8.73e-13	9.47e-13
1.11e-12	9.41e-13
3.11e-12	3.45e-12
1.37e-12	1.92e-12
4.52e-12	1.07e-12
7.85e-13	9.7e-13
1.99e-12	2.66e-12

## Sheet: Figure 1- figure supplement 2J
P50 first protocol	P50 second protocol
-29.264	-31.898
-42.711	-35.221
-29.672	-42.257
-30.305	-25.628
-29.617	-28.582
-27.089	-25.472
-30.914	-26.967
-31.031	-32.375
-40.69	-21.919
-31.537	-34.308
-27.346	-35.424
-30.207	-45.455
-28.847	-25.446
-26.537	-27.587
-21.353	-22.727
-34.303	-23.762
-32.03	-23.693
-26.386	-22.228
-36.833	-39.121
-34.693	-36.101
-28.382	-29.847
-41.04	-31.224
-30.688	-26.392
-29.682	-26.8447
-23.123	-28.629
-25.04	-24.529
-29.984	-25.322
-23.747	-29.128
-35.338	-28.523
-24.68	-27.752
-20.884	-20.543
-26.425	-26.666
-23.033	-27.25
-31.74	-25.646
-36.166	-26.583
-41.689	-24.353
-36.299	-24.758
-34.31	-34.83
-42.695	-22.419
-34.547	-33.656
-27.165	-25.703
-25.237	-20.237
-25.569	-24.476
-25.922	-17.293
-25.496	-24.728
-22.319	-25.525
-30.296	-25.956
-28.031	-29.279
-32.504	-21.659
-16.829	-24.168
-47.47	-44.835
-43.214	-40.386
-24.561	-21.885
-46.543	-42.313
-32.726	-30.081
-35.768	-30.277
-26.055	-27.558
-46.428	-41.987
-33.883	-33.034
-34.342	-26.318
-32.224	-20.348
-39.862	-28.779
-30.747	-23.129
-32.3	-27.729
-34.59	-30.736
-39.53	-40.105
-43.255	-40.421
-42.247	-34.794
-32.369	-28.354
-23.882	-22.367
-29.054	-24.095
-40.323	-33.212
-33.418	-27.897
-35.791	-26.481
-39.127	-48.314
-31.604	-30.68
-33.092	-33.068
-31.192	-38.815
-40.868	-45.925
-42.914	-49.565
-29.383	-35.808
-45.145	-33.514
-28.653	-26.727
-30.757	-19.015
-30.424	-28.059
-35.232	-40.004
-37.414	-27.682
-29.909	-19.681
-22.82	-38.659
-38.518	-44.684
-30.425	-52.497
-37.038	-38.357
-26.797	-25.111
-37.394	-35.136
-34.261	-27.156
-45.926	-43.766
-31.115	-28.389
-37.561	-31.892
-60.567	-43.488
-26.662	-21.869
-32.384	-26.62
-28.064	-36.007
-35.028	-42.39
-44.413	-37.225
-28.862	-47.06
-31.154	-33.061
-40.574	-48.129
-38.136	-41.79
-29.247	-25.054
-30.303	-28.115
-26.84	-21.757
-32.507	-38.91
-27.853	-23.156
-51.821	-36.054
-28.733	-28.105
-31.874	-27.86
-42.631	-35.136
-30.171	-44.638
-40.401	-38.328
-28.056	-26.627
-31.415	-30.794
-39.289	-29.654
-36.766	-40.767
-36.753	-25.203
-30.809	-22.981
-21.844	-37.291
-47.507	-37.696
-32.677	-21.485
-38.062	-32.142
-30.619	-34.392
-40.073	-29.164
-27.398	-77.883
-26.712	-27.658
-34.68	-26.809
-22.948	-29.519
-31.681	-19.93
-21.898	-35.332
-33.536	-32.441
-24.554	-26.451
-27.673	-34.095
-21.699	-33.45
-31.552	-28.476
-27.921	-25.894
-27.116	-24.494
-27.823	-26.171
-29.032	-28.034
-32.529	-30.76
-59.906	-22.439
-34.176	-33.042
-42.748	-21.204
-35.315	-29.171
-30.052	-26.079
-26.863	-20.786
-31.133	-28.106
-37.459	-32.653
-36.521	-30.545
-36.527	-29.965
-40.665	-30.923
-29.615	-27.791
-35.609	-31.812
-43.693	-42.358
-48.057	-38.475
-40.801	-43.966
-29.834	-24.657
-26.776	-21.499
-24.755	-28.581
-43.932	-34.524
-37.121	-25.681
-32.672	-30.938
-28.974	-27.95
-31.547	-32.741
-22.685	-27.523
-24.508	-25.784
-59.57	-52.06
-24.719	-22.876
-22.151	-42.566
-33.843	-33.977
-32.455	-35.948
-26.247	-30.187
-30.472	-27.474
-31.147	-31.926
-33.67	-30.928
-26.746	-27.514
-25.668	-22.639
-30.584	-32.751
-31.414	-24.25
-22.992	-23.112
-39.283	-34.643
-37.186	-28.903
-28.593	-27.373
-27.893	-29.085
-38.53	-31.599
-31.96	-25.809
-31.65	-29.222
-31.226	-31.044
-43.372	-34.54
-32.816	-35.52
-30.162	-25.752
-29.549	-31.88
-37.833	-29.135
-29.652	-31.708
-39.924	-32.444
-32.861	-32.47
-31.339	-37.116
-39.819	-30.745
-28.123	-29.863
-30.818	-30.476
-28.558	-29.9
-31.211	-33.858
-38.47	-29.334
-31.425	-30.034
-40.149	-30.646
-40.705	-50.331
-55.409	-34.003
-41.034	-31.31
-33.924	-38.988
