# Supplementary material for: Piezo1 ion channels inherently function as independent mechanotransducers
Source: eLife. 2021 Oct 29;10:e70988. doi: 10.7554/eLife.70988 (PMC8555984; doi:10.7554/eLife.70988)
Supplement: Figure 1—source data 1. [file elife-70988-fig1-data1.xlsx]

## Sheet: Figure 1E
Number of Channels	Counts
0	41
1	44
2	40
3	44
4	32
5	22
6	11
7	13
8	15
9	5
10	5
11	1
12	3
13	3
14	0
15	1
16	0
17	0
18	1
19	0
20	0

## Sheet: Figure 1F
	P50 (mmHg) as a function of channel number
# channels	0 to 2	2 to 4	4 to 6	6 to 8	8 to 10	10 to 12	12 to 14
	-54.109	-34.176	-32.529	-26.84	-29.984	-40.868	-26.425
	-37.833	-29.909	-31.96	-29.682	-30.303	-29.155	-33.883
	-60.567	-30.207	-35.315	-46.428	-23.747	-32.3	-32.224
	-28.123	-33.924	-31.604	-36.521	-22.319	-30.472	-25.569
	-41.034	-23.882	-36.299	-25.668	-32.672		-29.264
	-36.753	-28.064	-29.054	-30.688	-36.833
	-37.414	-40.801	-23.123	-37.121	-34.59
	-31.415	-26.662	-31.154	-30.305	-39.289
	-40.574	-22.685	-38.53	-27.165	-22.992
	-59.57	-28.382	-32.677	-26.746	-25.496
	-42.527	-34.31	-26.055	-33.536	-31.74
	-30.584	-45.145	-37.252	-35.768	-31.339
	-41.108	-36.166	-39.862	-28.593	-31.192
	-38.47	-35.791	-31.031	-31.414	-39.945
	-29.549	-35.028	-26.776	-31.65	-30.424
	-35.449	-36.766	-16.829	-33.418
	-30.757	-31.226	-28.558	-46.543
	-22.82	-26.863	-41.689	-26.712
	-32.03	-42.014	-27.346	-30.914
	-27.853	-32.384	-55.409	-27.089
	-22.948	-24.719	-37.038	-34.342
	-30.171	-38.062	-25.237	-37.561
	-22.151	-37.186	-32.726	-32.507
	-32.455	-34.68	-31.211	-29.383
	-26.247	-51.821	-33.843	-31.537
	-31.147	-30.818	-27.116	-29.834
	-23.616	-43.372	-25.04
	-27.823	-43.693	-44.413
	-37.447	-40.323	-21.898
	-31.425	-26.386	-28.847
	-35.609	-33.01	-31.547
	-32.861	-39.127	-30.296
	-32.504	-38.136	-24.68
	-32.812	-42.695	-23.033
	-21.699	-25.09	-27.921
	-20.884	-39.819	-31.133
	-27.673	-29.247	-28.974
	-40.401	-43.255	-43.932
	-40.705	-34.261	-29.617
	-40.69	-40.073	-26.537
	-31.874	-43.214	-32.369
	-28.031	-41.04	-42.711
	-31.552	-29.672
	-25.922	-29.652
	-30.425	-24.617
	-39.53	-40.149
	-39.283	-34.693
	-45.926	-40.665
	-30.809	-24.508
	-33.092	-35.338
	-30.619	-24.561
	-28.733	-34.547
	-27.893	-38.518
	-38.843	-30.052
	-28.862	-35.232
	-30.162	-42.247
	-42.914	-47.47
	-59.906	-24.554
	-47.507	-31.681
	-25.529	-42.631
	-21.844	-37.394
	-37.726	-34.965
	-21.353	-30.21
	-27.398	-39.246
		-42.748
		-33.67
		-26.797
		-39.936
		-29.032
		-24.755
		-28.056
		-31.115
		-30.747
		-37.459
		-39.924
		-32.816
		-36.527
		-29.615
		-32.636
		-34.303
