# Supplementary material for: Piezo1 ion channels inherently function as independent mechanotransducers
Source: eLife. 2021 Oct 29;10:e70988. doi: 10.7554/eLife.70988 (PMC8555984; doi:10.7554/eLife.70988)
Supplement: Figure 2—source data 1. [file elife-70988-fig2-data1.xlsx]

## Sheet: Figure 2B
Avg_1 channel	Avg_2 channels	Avg_3 channels	Avg_4 channels	Avg_5 channels	Pressure
0	0	0	0	0	0
0	0	0	0	0	0
0	0	0	0	0	0
0	0	0	0	0	0
0	0	0	0	0	0
0	0	0	0	0	0
0	0	0	0	0	0
0	0	0	0	0	0
0	0	0	0	0	0
0	0	0	0	0	0
0	0	0	0	0	0
0	0	0	0	0	0
0	0	0	0	0	0
0	0	0	0	0	0
0	0	0	0	0	0
0	0	0	0	0	0
0	0	0	0	0	0
0	0	0	0	0	0
0	0	0	0	0	0
0	0	0	0	0	0
0	0	0	0	0	0
0	0	0	0	0	0
0	0	0	0	0	0
0	0	0	0	0	0
0	0	0	0	0	0
0	0	0	0	0	0
0	0	0	0	0	0
0	0	0	0	0	0
0	0	0	0	0	0
0	0	0	0	0	0
0	0	0	0	0	0
0	0	0	0	0	0
0	0	0	0	0	0
0	0	0	0	0	0
0	0	0	0	0	0
0	0	0	0	0	0
0	0	0	0	0	0
0	0	0	0	0	0
0	0	0	0	0	0
0	0	0	0	0	0
0	0	0	0	0	0
0	0	0	0	0	0
0	0	0	0	0	0
0	0	0	0	0	0
0	0	0	0	0	0
0	0	0	0	0	0
0	0	0	0	0	0
0	0	0	0	0	0
0	0	0	0	0	0
0	0	0	0	0	0
0	0	0	0	0	-1
0	0	0	0	0	-1
0	0	0	0	0	-1
0	0	0	0	0	-1
0	0	0	0	0	-1
0	0	0	0	0	-1
0	0	0	0	0	-1
0	0	0	0	0	-1
0	0	0	0	0	-1
0	0	0	0	0	-1
0	0	0	0	0	-1
0	0	0	0	0	-1
0	0	0	0	0	-1
0	0	0	0	0	-1
0	0	0	0	0	-1
0	0	0	0	0	-1
0	0	0	0	0	-1
0	0	0	0	0	-1
0	0	0	0	0	-1
0	0	0	0	0	-1
0	0	0	0	0	-1
0	0	0	0	0	-1
0	0	0	0	0	-1
0	0	0	0	0	-1
0	0	0	0	0	-1
0	0	0	0	0	-1
0	0	0	0	0	-1
0	0	0	0	0	-1
0	0	0	0	0	-1
0	0	0	0	0	-1
0	0	0	0	0	-1
0	0	0	0	0	-1
0	0	0	0	0	-1
0	0	0	0	0	-1
0	0	0	0	0	-1
0	0	0	0	0	-1
0	0	0	0	0	-1
0	0	0	0	0	-1
0	0	0	0	0	-1
0	0	0	0	0	-1
0	0	0	0	0	-1
0	0	0	0	0	-1
0	0	0	0	0	-1
0	0	0	0	0	-1
0	0	0	0	0	-1
0	0	0	0	0	-1
0	0	0	0	0	-1
0	0	0	0	0	-1
0	0	0	0	0	-1
0	0	0	0	0	-1
0	0	0	0	0	-2
0	0	0	0	0	-2
0	0	0	0	0	-2
0	0	0	0	0	-2
0	0	0	0	0	-2
0	0	0	0	0	-2
0	0	0	0	0	-2
0	0	0	0	0	-2
0	0	0	0	0	-2
0	0	0	0	0	-2
0	0	0	0	0	-2
0	0	0	0	0	-2
0	0	0	0	0	-2
0	0	0	0	0	-2
0	0	0	0	0	-2
0	0	0	0	0	-2
0	0	0	0	0	-2
0	0	0	0	0	-2
0	0	0	0	0	-2
0	0	0	0	0	-2
0	0	0	0	0	-2
0	0	0	0	0	-2
0	0	0	0	0	-2
0	0	0	0	0	-2
0	0	0	0	0	-2
0	0	0	0	0	-2
0	0	0	0	0	-2
0	0	0	0	0	-2
0	0	0	0	0	-2
0	0	0	0	0	-2
0	0	0	0	0	-2
0	0	0	0	0	-2
0	0	0	0	0	-2
0	0	0	0	0	-2
0	0	0	0	0	-2
0	0	0	0	0	-2
0	0	0	0	0	-2
0	0	0	0	0	-2
0	0	0	0	0	-2
0	0	0	0	0	-2
0	0	0	0	0	-2
0	0	0	0	0	-2
0	0	0	0	0	-2
0	0	0	0	0	-2
0	0	0	0	0	-2
0	0	0	0	0	-2
0	0	0	0	0	-2
0	0	0	0	0	-2
0	0	0	0	0	-2
0	0	0	0	0	-2
0	0	0	0	0	-3
0	0	0	0	0	-3
0	0	0	0	0	-3
0	0	0	0	0	-3
0	0	0	0	0	-3
0	0	0	0	0	-3
0	0	0	0	0	-3
0	0	0	0	0	-3
0	0	0	0	0	-3
0	0	0	0	0	-3
0	0	0	0	0	-3
0	0	0	0	0	-3
0	0	0	0	0	-3
0	0	0	0	0	-3
0	0	0	0	0	-3
0	0	0	0	0	-3
0	0	0	0	0	-3
0	0	0	0	0	-3
0	0	0	0	0	-3
0	0	0	0	0	-3
0	0	0	0	0	-3
0	0	0	0	0	-3
0	0	0	0	0	-3
0	0	0	0	0	-3
0	0	0	0	0	-3
0	0	0	0	0	-3
0	0	0	0	0	-3
0	0	0	0	0	-3
0	0	0	0	0	-3
0	0	0	0	0	-3
0	0	0	0	0	-3
0	0	0	0	0	-3
0	0	0	0	0	-3
0	0	0	0	0	-3
0	0	0	0	0	-3
0	0	0	0	0	-3
0	0	0	0	0	-3
0	0	0	0	0	-3
0	0	0	0	0	-3
0	0	0	0	0	-3
0	0	0	0	0	-3
0	0	0	0	0	-3
0	0	0	0	0	-3
0	0	0	0	0	-3
0	0	0	0	0	-3
0	0	0	0	0	-3
0	0	0	0	0	-3
0	0	0	0	0	-3
0	0	0	0	0	-3
0	0	0	0	0	-3
0	0	0	0	0	-4
0	0	0	0	0	-4
0	0	0	0	0	-4
0	0	0	0	0	-4
0	0	0	0	0	-4
0	0	0	0	0	-4
0	0	0	0	0	-4
0	0	0	0	0	-4
0	0	0	0	0	-4
0	0	0	0	0	-4
0	0	0	0	0	-4
0	0	0	0	0	-4
0	0	0	0	0	-4
0	0	0	0	0	-4
0	0	0	0	0	-4
0	0	0	0	0	-4
0	0	0	0	0	-4
0	0	0	0	0	-4
0	0	0	0	0	-4
0	0	0	0	0	-4
0	0	0	0	0	-4
0	0	0	0	0	-4
0	0	0	0	0	-4
0	0	0	0	0	-4
0	0	0	0	0	-4
0	0	0	0	0	-4
0	0	0	0	0	-4
0	0	0	0	0	-4
0	0	0	0	0	-4
0	0	0	0	0	-4
0	0	0	0	0	-4
0	0	0	0	0	-4
0	0	0	0	0	-4
0	0	0	0	0	-4
0	0	0	0	0	-4
0	0	0	0	0	-4
0	0	0	0	0	-4
0	0	0	0	0	-4
0	0	0	0	0	-4
0	0	0	0	0	-4
0	0	0	0	0	-4
0	0	0	0	0	-4
0	0	0	0	0	-4
0	0	0	0	0	-4
0	0	0	0	0	-4
0	0	0	0	0	-4
0	0	0	0	0	-4
0	0	0	0	0	-4
0	0	0	0	0	-4
0	0	0	0	0	-4
0	0	0	0	0	-5
0	0	0	0	0	-5
0	0	0	0	0	-5
0	0	0	0	0	-5
0	0	0	0	0	-5
0	0	0	0	0	-5
0	0	0	0	0	-5
0	0	0	0	0	-5
0	0	0	0	0	-5
0	0	0	0	0	-5
0	0	0	0	0	-5
0	0	0	0	0	-5
0	0	0	0	0	-5
0	0	0	0	0	-5
0	0	0	0	0	-5
0	0	0	0	0	-5
0	0	0	0	0	-5
0	0	0	0	0	-5
0	0	0	0	0	-5
0	0	0	0	0	-5
0	0	0	0	0	-5
0	0	0	0	0	-5
0	0	0	0	0	-5
0	0	0	0	0	-5
0	0	0	0	0	-5
0	0	0	0	0	-5
0	0	0	0	0	-5
0	0	0	0	0	-5
0	0	0	0	0	-5
0	0	0	0	0	-5
0	0	0	0	0	-5
0	0	0	0	0	-5
0	0	0	0	0	-5
0	0	0	0	0	-5
0	0	0	0	0	-5
0	0	0	0	0	-5
0	0	0	0	0	-5
0	0	0	0	0	-5
0	0	0	0	0	-5
0	0	0	0	0	-5
0	0	0	0	0	-5
0	0	0	0	0	-5
0	0	0	0	0	-5
0	0	0	0	0	-5
0	0	0	0	0	-5
0	0	0	0	0	-5
0	0	0	0	0	-5
0	0	0	0	0	-5
0	0	0	0	0	-5
0	0	0	0	0	-5
0	0	0	0	0	-6
0	0	0	0	0	-6
0	0	0	0	0	-6
0	0	0	0	0	-6
0	0	0	0	0	-6
0	0	0	0	0	-6
0	0	0	0	0	-6
0	0	0	0	0	-6
0	0	0	0	0	-6
0	0	0	0	0	-6
0	0	0	0	0	-6
0	0	0	0	0	-6
0	0	0	0	0	-6
0	0	0	0	0	-6
0	0	0	0	0	-6
0	0	0	0	0	-6
0	0	0	0	0	-6
0	0	0	0	0	-6
0	0	0	0	0	-6
0	0	0	0	0	-6
0	0	0	0	0	-6
0	0	0	0	0	-6
0	0	0	0	0	-6
0	0	0	0	0	-6
0	0	0	0	0	-6
0	0	0	0	0	-6
0	0	0	0	0	-6
0	0	0	0	0	-6
0	0	0	0	0	-6
0	0	0	0	0	-6
0	0	0	0	0	-6
0	0	0	0	0	-6
0	0	0	0	0	-6
0	0	0	0	0	-6
0	0	0	0	0	-6
0	0	0	0	0	-6
0	0	0	0	0	-6
0	0	0	0	0	-6
0	0	0	0	0	-6
0	0	0	0	0	-6
0	0	0	0	0	-6
0	0	0	0	0	-6
0	0	0	0	0	-6
0	0	0	0	0	-6
0	0	0	0	0	-6
0	0	0	0	0	-6
0	0	0	0	0	-6
0	0.0125	0	0	0	-6
0	0.0125	0	0	0	-6
0	0.0125	0	0	0	-6
0	0.0125	0	0	0	-7
0	0.0125	0	0	0	-7
0	0.0125	0	0	0	-7
0	0.0125	0	0	0	-7
0	0.0125	0	0	0	-7
0	0.0125	0	0	0	-7
0	0.0125	0	0	0	-7
0	0.0125	0	0	0	-7
0	0.0125	0	0	0	-7
0	0.0125	0	0	0	-7
0	0.0125	0	0	0	-7
0	0.0125	0	0	0	-7
0	0.0125	0	0	0	-7
0	0.0125	0	0	0	-7
0	0.0125	0	0	0	-7
0	0.0125	0	0	0	-7
0	0.0125	0	0	0	-7
0	0.0125	0	0	0	-7
0	0.0125	0	0	0	-7
0	0.0125	0	0	0	-7
0	0.0125	0	0	0	-7
0	0.0125	0	0	0	-7
0	0.0125	0	0	0	-7
0	0.0125	0	0	0	-7
0	0.0125	0	0	0	-7
0	0.0125	0	0	0	-7
0	0.0125	0	0	0	-7
0	0.0125	0	0	0	-7
0	0.0125	0	0	0	-7
0	0.0125	0	0	0	-7
0	0.0125	0	0	0	-7
0	0.0125	0	0	0	-7
0	0.0125	0	0	0	-7
0	0.0125	0	0	0	-7
0	0.0125	0	0	0	-7
0	0.0125	0	0	0	-7
0	0.0125	0	0	0	-7
0	0.0125	0	0	0	-7
0	0.0125	0	0	0	-7
0	0.0125	0	0	0	-7
0	0.0125	0	0	0	-7
0	0.0125	0	0	0	-7
0	0.0125	0	0	0	-7
0	0.0125	0	0	0	-7
0	0.0125	0	0	0	-7
0	0.0125	0	0	0	-7
0	0.0125	0	0	0	-7
0	0.0125	0	0	0	-7
0	0.0125	0	0	0	-7
0	0.0125	0	0	0	-7
0	0.0125	0	0	0	-8
0	0.0125	0	0	0	-8
0	0.0125	0	0	0	-8
0	0.0125	0	0	0	-8
0	0.0125	0	0	0	-8
0	0.0125	0	0	0	-8
0	0.0125	0	0	0	-8
0	0.0125	0	0	0	-8
0	0.0125	0	0	0	-8
0	0.0125	0	0	0	-8
0	0.0125	0	0	0	-8
0	0.025	0	0	0	-8
0	0.025	0	0	0	-8
0	0.025	0	0	0	-8
0	0.025	0	0	0	-8
0	0.025	0	0	0	-8
0	0.025	0	0	0	-8
0	0.025	0	0	0	-8
0	0.025	0	0	0	-8
0	0.025	0	0	0	-8
0	0.025	0	0	0	-8
0	0.025	0	0	0	-8
0	0.025	0	0	0	-8
0	0.025	0	0	0	-8
0	0.025	0	0	0	-8
0	0.025	0	0	0	-8
0	0.025	0	0	0	-8
0	0.025	0	0	0	-8
0	0.025	0	0	0	-8
0	0.025	0	0	0	-8
0	0.025	0	0	0	-8
0	0.025	0	0	0	-8
0	0.025	0	0	0	-8
0	0.025	0	0	0	-8
0	0.025	0	0	0	-8
0	0.025	0	0	0	-8
0	0.025	0	0	0	-8
0	0.025	0	0	0	-8
0	0.025	0	0	0	-8
0	0.025	0	0	0	-8
0	0.025	0	0	0	-8
0	0.025	0	0	0	-8
0	0.025	0	0	0	-8
0	0.025	0	0	0	-8
0	0.025	0	0	0	-8
0	0.025	0	0	0	-8
0	0.025	0	0	0	-8
0	0.025	0	0	0	-8
0	0.025	0	0	0	-8
0	0.025	0	0	0	-8
0	0.025	0	0	0	-9
0	0.025	0	0	0	-9
0	0.025	0	0	0	-9
0	0.025	0	0	0	-9
0	0.025	0	0	0	-9
0	0.025	0	0	0	-9
0	0.025	0	0	0	-9
0	0.025	0	0	0	-9
0	0.025	0	0	0	-9
0	0.025	0	0	0	-9
0	0.025	0	0	0	-9
0	0.025	0	0	0	-9
0	0.025	0	0	0	-9
0	0.025	0	0	0	-9
0	0.025	0	0	0	-9
0	0.025	0	0	0	-9
0	0.025	0	0	0	-9
0	0.025	0	0	0	-9
0	0.025	0	0	0	-9
0	0.025	0	0	0	-9
0	0.025	0	0	0	-9
0	0.025	0	0	0	-9
0	0.025	0	0	0	-9
0	0.025	0	0	0	-9
0	0.025	0	0	0	-9
0	0.025	0	0	0	-9
0	0.025	0	0	0	-9
0	0.025	0	0	0	-9
0	0.025	0	0	0	-9
0	0.025	0	0	0	-9
0	0.025	0	0	0	-9
0	0.025	0	0	0	-9
0	0.025	0	0	0	-9
0	0.025	0	0	0	-9
0	0.025	0	0	0	-9
0	0.025	0	0	0	-9
0	0.025	0	0	0	-9
0	0.025	0	0	0	-9
0	0.025	0	0	0	-9
0	0.025	0	0	0	-9
0	0.025	0	0	0	-9
0	0.025	0	0	0	-9
0	0.025	0	0	0	-9
0	0.025	0	0	0	-9
0	0.025	0	0	0	-9
0	0.025	0	0	0	-9
0	0.025	0	0	0	-9
0	0.025	0	0	0	-9
0	0.025	0	0	0	-9
0	0.025	0	0	0	-9
0	0.025	0	0	0	-10
0	0.025	0	0	0	-10
0	0.025	0	0	0	-10
0	0.025	0	0	0	-10
0	0.025	0	0	0	-10
0	0.025	0	0	0	-10
0	0.025	0	0	0	-10
0	0.025	0	0	0	-10
0	0.025	0	0	0	-10
0	0.025	0	0	0	-10
0	0.025	0	0	0	-10
0	0.025	0	0	0	-10
0	0.025	0	0	0	-10
0	0.025	0	0	0	-10
0	0.025	0	0	0	-10
0	0.025	0	0	0	-10
0	0.025	0	0	0	-10
0	0.025	0	0	0	-10
0	0.025	0	0	0	-10
0	0.025	0	0	0	-10
0	0.025	0	0	0	-10
0	0.025	0	0	0	-10
0	0.025	0	0	0	-10
0	0.025	0	0	0	-10
0	0.025	0	0	0	-10
0	0.025	0	0	0	-10
0	0.025	0	0	0	-10
0	0.025	0	0	0	-10
0	0.0375	0	0	0	-10
0	0.0375	0	0	0	-10
0	0.0375	0	0	0	-10
0	0.0375	0	0	0	-10
0	0.0375	0	0	0	-10
0	0.0375	0	0	0	-10
0	0.0375	0	0	0	-10
0	0.0375	0	0	0	-10
0	0.0375	0	0	0	-10
0	0.0375	0	0	0	-10
0	0.0375	0	0	0	-10
0	0.0375	0	0	0	-10
0	0.0375	0	0	0	-10
0	0.0375	0	0	0	-10
0	0.0375	0	0	0	-10
0	0.0375	0	0	0	-10
0	0.0375	0	0	0	-10
0	0.0375	0	0	0	-10
0	0.0375	0	0	0	-10
0	0.0375	0	0	0	-10
0	0.0375	0	0	0	-10
0	0.0375	0	0	0	-10
0	0.0375	0	0	0	-11
0	0.0375	0	0	0	-11
0	0.0375	0	0	0	-11
0	0.0375	0	0	0	-11
0	0.0375	0	0	0	-11
0	0.0375	0	0	0	-11
0	0.0375	0	0	0	-11
0	0.0375	0	0	0	-11
0	0.0375	0	0	0	-11
0	0.0375	0	0	0	-11
0	0.0375	0	0	0	-11
0	0.0375	0	0	0	-11
0	0.0375	0	0	0	-11
0	0.0375	0	0	0	-11
0	0.0375	0	0	0	-11
0	0.0375	0	0	0	-11
0	0.0375	0	0	0	-11
0	0.0375	0	0	0	-11
0	0.0375	0	0	0	-11
0	0.0375	0	0	0	-11
0	0.0375	0	0	0	-11
0	0.0375	0	0	0	-11
0	0.0375	0	0	0	-11
0	0.0375	0	0	0	-11
0	0.0375	0	0	0	-11
0	0.0375	0	0	0	-11
0	0.0375	0	0	0	-11
0	0.0375	0	0	0	-11
0	0.0375	0	0	0	-11
0	0.0375	0	0	0	-11
0	0.0375	0	0	0	-11
0	0.0375	0	0	0	-11
0	0.0375	0	0	0	-11
0	0.0375	0	0	0	-11
0	0.0375	0	0	0	-11
0	0.0375	0	0	0	-11
0	0.0375	0	0	0	-11
0	0.0375	0	0	0	-11
0	0.0375	0	0	0	-11
0	0.0375	0	0	0	-11
0	0.0375	0	0	0	-11
0	0.0375	0	0	0	-11
0	0.0375	0	0	0	-11
0	0.0375	0	0	0	-11
0	0.0375	0	0	0	-11
0	0.0375	0	0	0	-11
0	0.0375	0	0	0	-11
0	0.0375	0	0	0	-11
0	0.0375	0	0	0	-11
0	0.0375	0	0	0	-11
0	0.0375	0	0	0	-12
0	0.0375	0	0	0	-12
0	0.0375	0	0	0	-12
0	0.0375	0	0	0	-12
0	0.0375	0	0	0	-12
0	0.0375	0	0	0	-12
0	0.0375	0	0	0	-12
0	0.0375	0	0	0	-12
0	0.0375	0	0	0	-12
0	0.0375	0	0	0	-12
0	0.0375	0	0	0	-12
0	0.0375	0	0	0	-12
0	0.0375	0	0	0	-12
0	0.0375	0	0	0	-12
0	0.0375	0	0	0	-12
0	0.0375	0	0	0	-12
0	0.0375	0	0	0	-12
0	0.0375	0	0	0	-12
0	0.0375	0	0	0	-12
0	0.0375	0	0	0	-12
0	0.0375	0	0	0	-12
0	0.0375	0	0	0	-12
0	0.0375	0	0	0	-12
0	0.0375	0	0	0	-12
0	0.0375	0	0	0	-12
0	0.0375	0	0	0	-12
0	0.0375	0	0	0	-12
0	0.0375	0	0	0	-12
0	0.0375	0	0	0	-12
0	0.0375	0	0	0	-12
0	0.0375	0	0	0	-12
0	0.0375	0	0	0	-12
0	0.0375	0	0	0	-12
0	0.0375	0	0	0	-12
0	0.0375	0	0	0	-12
0	0.0375	0	0	0	-12
0	0.0375	0	0	0	-12
0	0.0375	0	0	0	-12
0	0.0375	0	0	0	-12
0	0.0375	0	0	0	-12
0	0.0375	0	0	0	-12
0	0.0375	0	0	0	-12
0	0.0375	0	0	0	-12
0	0.0375	0	0	0	-12
0	0.0375	0	0	0	-12
0	0.0375	0	0	0	-12
0	0.0375	0	0	0	-12
0	0.0375	0	0	0	-12
0	0.0375	0	0	0	-12
0	0.0375	0	0	0	-12
0	0.0375	0	0	0	-13
0	0.0375	0	0	0	-13
0	0.0375	0	0	0	-13
0	0.0375	0	0	0	-13
0	0.0375	0	0	0	-13
0	0.0375	0	0	0	-13
0	0.0375	0	0	0	-13
0	0.0375	0	0	0	-13
0	0.0375	0	0	0	-13
0	0.0375	0	0	0	-13
0	0.0375	0	0	0	-13
0	0.0375	0	0	0	-13
0	0.0375	0	0	0	-13
0	0.0375	0	0	0	-13
0	0.0375	0	0	0	-13
0	0.0375	0	0	0	-13
0	0.0375	0	0	0	-13
0	0.0375	0	0	0	-13
0	0.0375	0	0	0	-13
0	0.0375	0	0	0	-13
0	0.0375	0	0	0	-13
0	0.0375	0	0	0	-13
0	0.0375	0	0	0	-13
0	0.0375	0	0	0	-13
0	0.0375	0	0	0	-13
0	0.0375	0	0	0	-13
0	0.0375	0	0	0	-13
0	0.0375	0	0	0	-13
0	0.0375	0	0	0	-13
0	0.0375	0	0	0	-13
0	0.0375	0	0	0	-13
0	0.0375	0	0	0	-13
0	0.0375	0	0	0	-13
0	0.0375	0	0	0	-13
0	0.0375	0	0	0	-13
0	0.0375	0	0	0	-13
0	0.0375	0	0	0	-13
0	0.0375	0	0	0	-13
0	0.0375	0	0	0	-13
0	0.0375	0	0	0	-13
0	0.0375	0	0	0	-13
0	0.0375	0	0	0	-13
0	0.0375	0	0	0	-13
0	0.0375	0	0	0	-13
0	0.0375	0	0	0	-13
0	0.0375	0	0	0	-13
0	0.05	0	0	0	-13
0	0.05	0	0	0	-13
0	0.05	0	0	0	-13
0	0.05	0	0	0	-13
0	0.05	0	0	0	-14
0	0.05	0	0	0	-14
0	0.05	0	0	0	-14
0	0.05	0	0	0	-14
0	0.05	0	0	0	-14
0	0.05	0	0	0	-14
0	0.05	0	0	0	-14
0	0.05	0	0	0	-14
0	0.05	0	0	0	-14
0	0.05	0	0	0	-14
0	0.05	0	0	0	-14
0	0.0625	0	0	0	-14
0	0.0625	0	0	0	-14
0	0.0625	0	0	0	-14
0	0.0625	0	0	0	-14
0	0.0625	0	0	0	-14
0	0.0625	0	0	0	-14
0	0.0625	0	0	0	-14
0	0.0625	0	0	0	-14
0	0.0625	0	0	0	-14
0	0.0625	0	0	0	-14
0	0.0625	0	0	0	-14
0	0.0625	0	0	0	-14
0	0.0625	0	0	0	-14
0	0.0625	0	0	0	-14
0	0.0625	0	0	0	-14
0	0.0625	0	0	0	-14
0	0.0625	0	0	0	-14
0	0.0625	0	0	0	-14
0	0.075	0	0	0	-14
0	0.075	0	0.00925926	0	-14
0	0.075	0	0.00925926	0	-14
0	0.075	0	0.00925926	0	-14
0	0.075	0	0.00925926	0	-14
0	0.075	0	0.00925926	0	-14
0	0.075	0	0.00925926	0	-14
0	0.075	0	0.00925926	0	-14
0	0.075	0	0.00925926	0	-14
0	0.075	0	0.00925926	0	-14
0	0.075	0	0.00925926	0	-14
0	0.075	0	0.00925926	0	-14
0	0.075	0	0.00925926	0	-14
0	0.075	0	0.00925926	0	-14
0	0.075	0	0.00925926	0	-14
0	0.075	0	0.00925926	0	-14
0	0.075	0	0.00925926	0	-14
0	0.075	0	0.00925926	0	-14
0	0.075	0	0.00925926	0	-14
0	0.075	0	0.00925926	0	-14
0	0.075	0	0.00925926	0	-14
0	0.075	0	0.00925926	0	-15
0	0.075	0	0.00925926	0	-15
0	0.075	0	0.00925926	0	-15
0	0.075	0	0.00925926	0	-15
0	0.075	0	0.00925926	0	-15
0	0.075	0	0.00925926	0	-15
0	0.075	0	0.00925926	0	-15
0	0.075	0	0.00925926	0	-15
0	0.075	0	0.00925926	0	-15
0	0.075	0	0.00925926	0	-15
0	0.075	0	0.00925926	0	-15
0	0.075	0	0.00925926	0	-15
0	0.075	0	0.00925926	0	-15
0	0.075	0	0.00925926	0	-15
0	0.075	0	0.00925926	0	-15
0	0.075	0	0.00925926	0	-15
0	0.075	0.0100909	0.00925926	0	-15
0	0.075	0.0100909	0.00925926	0	-15
0	0.075	0.0100909	0.00925926	0	-15
0	0.075	0.0100909	0.0185185	0	-15
0	0.075	0.0100909	0.0185185	0	-15
0	0.075	0.0100909	0.0185185	0	-15
0	0.075	0.0100909	0.0185185	0	-15
0	0.075	0.0100909	0.0185185	0	-15
0	0.075	0.0100909	0.0185185	0	-15
0	0.075	0.0100909	0.0185185	0	-15
0	0.075	0.0100909	0.0185185	0	-15
0	0.075	0.0100909	0.0185185	0	-15
0	0.075	0.0100909	0.0185185	0	-15
0	0.075	0.0100909	0.0185185	0	-15
0	0.075	0.0100909	0.0185185	0	-15
0	0.075	0.0100909	0.0185185	0	-15
0	0.075	0.0100909	0.0185185	0	-15
0	0.075	0.0100909	0.0185185	0	-15
0	0.075	0.0100909	0.0185185	0	-15
0	0.075	0.0100909	0.0185185	0	-15
0	0.075	0.0100909	0.0185185	0	-15
0	0.075	0.0100909	0.0185185	0	-15
0	0.075	0.0100909	0.0185185	0	-15
0	0.075	0.0100909	0.0185185	0	-15
0	0.075	0.0100909	0.0185185	0	-15
0	0.075	0.0100909	0.0185185	0	-15
0	0.075	0.0100909	0.0185185	0	-15
0	0.075	0.0100909	0.0185185	0	-15
0	0.075	0.0201818	0.0185185	0	-15
0	0.075	0.0201818	0.0185185	0	-15
0	0.075	0.0201818	0.0185185	0	-15
0	0.075	0.0201818	0.0185185	0	-15
0	0.075	0.0201818	0.0185185	0	-15
0	0.075	0.0201818	0.0185185	0	-15
0	0.075	0.0201818	0.0185185	0	-16
0	0.075	0.0201818	0.0185185	0	-16
0	0.075	0.0201818	0.0185185	0	-16
0	0.075	0.0201818	0.0185185	0	-16
0	0.075	0.0201818	0.0185185	0	-16
0	0.075	0.0201818	0.0185185	0	-16
0	0.075	0.0201818	0.0185185	0	-16
0	0.075	0.0201818	0.0185185	0	-16
0	0.075	0.0201818	0.0185185	0	-16
0	0.075	0.0201818	0.0185185	0	-16
0	0.075	0.0201818	0.0185185	0	-16
0	0.075	0.0201818	0.0185185	0	-16
0	0.075	0.0201818	0.0185185	0	-16
0	0.075	0.0201818	0.0185185	0	-16
0	0.075	0.0201818	0.0185185	0	-16
0	0.075	0.0201818	0.0185185	0	-16
0	0.075	0.0201818	0.0185185	0	-16
0	0.075	0.0201818	0.0185185	0	-16
0	0.075	0.0201818	0.0185185	0	-16
0	0.075	0.0201818	0.0185185	0	-16
0	0.0875	0.0201818	0.0185185	0	-16
0	0.1	0.0201818	0.0185185	0	-16
0	0.1	0.0201818	0.0185185	0	-16
0	0.1	0.0201818	0.0185185	0	-16
0	0.1	0.0201818	0.0277778	0	-16
0	0.1	0.0201818	0.0277778	0	-16
0	0.1	0.0201818	0.0277778	0	-16
0	0.1	0.0201818	0.0277778	0	-16
0	0.1	0.0201818	0.0277778	0	-16
0	0.1	0.0201818	0.0277778	0	-16
0	0.1	0.0201818	0.0277778	0	-16
0	0.1	0.0201818	0.0277778	0	-16
0	0.1	0.0201818	0.0277778	0.0222222	-16
0	0.1	0.0201818	0.0277778	0.0222222	-16
0	0.1	0.0201818	0.0277778	0.0222222	-16
0	0.1	0.0201818	0.0277778	0.0222222	-16
0	0.1	0.0201818	0.0277778	0.0222222	-16
0	0.1	0.0201818	0.0277778	0.0222222	-16
0	0.1	0.0201818	0.0277778	0.0222222	-16
0	0.1	0.0201818	0.037037	0.0222222	-16
0	0.1	0.0201818	0.037037	0.0222222	-16
0	0.1	0.0201818	0.037037	0.0222222	-16
0	0.1	0.0201818	0.037037	0.0222222	-16
0	0.1	0.0201818	0.037037	0.0222222	-16
0	0.0875	0.0201818	0.037037	0.0222222	-16
0	0.0875	0.0201818	0.037037	0.0222222	-16
0	0.0875	0.0201818	0.037037	0.0222222	-16
0	0.0875	0.0201818	0.037037	0.0222222	-16
0	0.0875	0.0201818	0.037037	0.0222222	-16
0	0.0875	0.0201818	0.037037	0.0222222	-16
0	0.0875	0.0201818	0.037037	0.0222222	-17
0	0.0875	0.0201818	0.037037	0.0222222	-17
0	0.0875	0.0201818	0.037037	0.0444444	-17
0	0.0875	0.0201818	0.037037	0.0444444	-17
0	0.0875	0.0201818	0.037037	0.0444444	-17
0	0.0875	0.0201818	0.037037	0.0444444	-17
0	0.0875	0.0201818	0.037037	0.0444444	-17
0	0.0875	0.0201818	0.037037	0.0444444	-17
0	0.0875	0.0201818	0.037037	0.0444444	-17
0	0.0875	0.0201818	0.037037	0.0444444	-17
0	0.0875	0.0201818	0.037037	0.0444444	-17
0	0.0875	0.0201818	0.037037	0.0444444	-17
0	0.0875	0.0201818	0.037037	0.0444444	-17
0	0.1	0.0201818	0.037037	0.0444444	-17
0	0.1	0.0201818	0.0462963	0.0444444	-17
0	0.1	0.0201818	0.0462963	0.0444444	-17
0	0.1	0.0201818	0.0555556	0.0444444	-17
0	0.1	0.0201818	0.0555556	0.0444444	-17
0	0.1	0.0201818	0.0555556	0.0444444	-17
0	0.1	0.0201818	0.0555556	0.0444444	-17
0	0.1	0.0201818	0.0555556	0.0444444	-17
0	0.1	0.0201818	0.0648148	0.0444444	-17
0	0.1	0.0201818	0.0648148	0.0444444	-17
0	0.1	0.0201818	0.0648148	0.0444444	-17
0	0.1	0.0201818	0.0648148	0.0444444	-17
0	0.1	0.0201818	0.0648148	0.0444444	-17
0	0.1	0.0201818	0.0648148	0.0444444	-17
0	0.1	0.0201818	0.0648148	0.0444444	-17
0	0.1	0.0302727	0.0648148	0.0444444	-17
0	0.1	0.0302727	0.0648148	0.0444444	-17
0	0.1	0.0302727	0.0648148	0.0444444	-17
0	0.1	0.0302727	0.0648148	0.0444444	-17
0	0.1	0.0302727	0.0648148	0.0444444	-17
0	0.1	0.0302727	0.0648148	0.0444444	-17
0	0.1	0.0302727	0.0648148	0.0444444	-17
0	0.1	0.0302727	0.0648148	0.0444444	-17
0	0.1125	0.0302727	0.0648148	0.0444444	-17
0	0.1125	0.0302727	0.0648148	0.0444444	-17
0	0.1125	0.0302727	0.0648148	0.0444444	-17
0	0.1125	0.0302727	0.0648148	0.0444444	-17
0	0.1125	0.0302727	0.0648148	0.0444444	-17
0	0.1125	0.0302727	0.0648148	0.0444444	-17
0	0.1125	0.0302727	0.0648148	0.0444444	-17
0	0.1125	0.0302727	0.0648148	0.0444444	-17
0	0.1125	0.0302727	0.0648148	0.0444444	-17
0	0.1125	0.0302727	0.0648148	0.0444444	-17
0	0.1125	0.0302727	0.0648148	0.0444444	-17
0	0.1125	0.0302727	0.0648148	0.0444444	-17
0	0.1125	0.0302727	0.0648148	0.0444444	-17
0	0.1125	0.0302727	0.0648148	0.0444444	-17
0	0.1125	0.0302727	0.0648148	0.0444444	-18
0	0.1125	0.0302727	0.0740741	0.0444444	-18
0	0.1125	0.0302727	0.0740741	0.0444444	-18
0	0.1125	0.0403636	0.0740741	0.0444444	-18
0	0.1125	0.0403636	0.0740741	0.0444444	-18
0	0.1125	0.0403636	0.0740741	0.0444444	-18
0	0.1125	0.0403636	0.0740741	0.0444444	-18
0	0.1125	0.0403636	0.0740741	0.0444444	-18
0	0.1125	0.0403636	0.0740741	0.0666667	-18
0	0.1125	0.0403636	0.0740741	0.0666667	-18
0	0.1125	0.0403636	0.0740741	0.0666667	-18
0	0.1125	0.0403636	0.0833333	0.0666667	-18
0	0.1125	0.0403636	0.0833333	0.0666667	-18
0	0.1125	0.0403636	0.0833333	0.0666667	-18
0	0.1125	0.0403636	0.0833333	0.0666667	-18
0	0.1125	0.0403636	0.0833333	0.0666667	-18
0	0.1125	0.0403636	0.0925926	0.0666667	-18
0	0.1125	0.0403636	0.0925926	0.0666667	-18
0	0.1125	0.0403636	0.0925926	0.0666667	-18
0	0.1125	0.0403636	0.0925926	0.0666667	-18
0	0.1125	0.0403636	0.0925926	0.0666667	-18
0	0.1125	0.0403636	0.0925926	0.0666667	-18
0	0.1125	0.0403636	0.0925926	0.0666667	-18
0	0.1125	0.0403636	0.101852	0.0666667	-18
0	0.1125	0.0403636	0.101852	0.0666667	-18
0	0.1125	0.0403636	0.101852	0.0666667	-18
0	0.1125	0.0403636	0.101852	0.0666667	-18
0	0.1125	0.0302727	0.101852	0.0666667	-18
0	0.1125	0.0302727	0.101852	0.0666667	-18
0	0.1125	0.0302727	0.101852	0.0666667	-18
0	0.1125	0.0403636	0.101852	0.0666667	-18
0	0.1125	0.0403636	0.101852	0.0666667	-18
0	0.1125	0.0403636	0.101852	0.0666667	-18
0	0.1125	0.0403636	0.101852	0.0666667	-18
0	0.1125	0.0403636	0.101852	0.0666667	-18
0.0294118	0.1125	0.0403636	0.101852	0.0666667	-18
0.0294118	0.125	0.0403636	0.101852	0.0666667	-18
0.0294118	0.125	0.0403636	0.101852	0.0666667	-18
0.0294118	0.125	0.0403636	0.101852	0.0666667	-18
0.0294118	0.125	0.0403636	0.101852	0.0666667	-18
0.0294118	0.125	0.0403636	0.101852	0.0666667	-18
0.0294118	0.125	0.0403636	0.0925926	0.0666667	-18
0.0294118	0.125	0.0403636	0.0925926	0.0666667	-18
0.0294118	0.125	0.0403636	0.0925926	0.0888889	-18
0.0294118	0.125	0.0403636	0.0925926	0.0888889	-18
0.0294118	0.125	0.0403636	0.0925926	0.0888889	-18
0.0294118	0.125	0.0403636	0.0925926	0.0888889	-18
0.0294118	0.125	0.0403636	0.0925926	0.0888889	-18
0.0294118	0.125	0.0403636	0.0925926	0.0888889	-18
0.0294118	0.125	0.0403636	0.0925926	0.0888889	-18
0.0294118	0.125	0.0403636	0.0925926	0.0888889	-19
0.0294118	0.125	0.0403636	0.0925926	0.0888889	-19
0.0294118	0.125	0.0403636	0.0925926	0.0888889	-19
0.0294118	0.125	0.0403636	0.0925926	0.0888889	-19
0.0294118	0.125	0.0403636	0.0925926	0.0888889	-19
0.0294118	0.125	0.0403636	0.0925926	0.0666667	-19
0.0588235	0.125	0.0403636	0.0925926	0.0666667	-19
0.0588235	0.125	0.0403636	0.0925926	0.0666667	-19
0.0588235	0.125	0.0403636	0.0925926	0.0666667	-19
0.0588235	0.125	0.0403636	0.0925926	0.0666667	-19
0.0588235	0.125	0.0403636	0.0925926	0.0666667	-19
0.0588235	0.125	0.0403636	0.0925926	0.0666667	-19
0.0588235	0.1375	0.0403636	0.0925926	0.0666667	-19
0.0588235	0.1375	0.0403636	0.0925926	0.0666667	-19
0.0588235	0.15	0.0403636	0.0925926	0.0666667	-19
0.0588235	0.15	0.0403636	0.0925926	0.0666667	-19
0.0588235	0.15	0.0403636	0.0925926	0.0666667	-19
0.0588235	0.15	0.0403636	0.0925926	0.0666667	-19
0.0588235	0.15	0.0403636	0.0925926	0.0666667	-19
0.0588235	0.15	0.0403636	0.0925926	0.0666667	-19
0.0588235	0.15	0.0403636	0.0925926	0.0666667	-19
0.0588235	0.15	0.0403636	0.0925926	0.0666667	-19
0.0588235	0.1625	0.0403636	0.0925926	0.0666667	-19
0.0588235	0.1625	0.0403636	0.0925926	0.0666667	-19
0.0588235	0.1625	0.0403636	0.0925926	0.0666667	-19
0.0882353	0.1625	0.0403636	0.0925926	0.0666667	-19
0.0882353	0.1625	0.0403636	0.0925926	0.0666667	-19
0.0882353	0.1625	0.0403636	0.0925926	0.0666667	-19
0.0882353	0.1625	0.0403636	0.0925926	0.0666667	-19
0.0882353	0.1625	0.0403636	0.0925926	0.0666667	-19
0.0882353	0.1625	0.0403636	0.0925926	0.0666667	-19
0.0882353	0.1625	0.0403636	0.0925926	0.0666667	-19
0.0882353	0.1625	0.0403636	0.0925926	0.0666667	-19
0.0882353	0.1625	0.0403636	0.0925926	0.0666667	-19
0.0882353	0.1625	0.0403636	0.0925926	0.0666667	-19
0.0882353	0.1625	0.0403636	0.0925926	0.0666667	-19
0.0882353	0.1625	0.0403636	0.0925926	0.0666667	-19
0.0882353	0.1625	0.0504545	0.0925926	0.0666667	-19
0.0882353	0.1625	0.0504545	0.0925926	0.0666667	-19
0.0882353	0.1625	0.0504545	0.0925926	0.0666667	-19
0.0882353	0.1625	0.0504545	0.0925926	0.0666667	-19
0.0882353	0.1625	0.0605455	0.0925926	0.0888889	-19
0.0882353	0.1625	0.0605455	0.0925926	0.0888889	-19
0.0882353	0.1625	0.0605455	0.0925926	0.0888889	-19
0.0882353	0.1625	0.0605455	0.0925926	0.0888889	-19
0.0882353	0.1625	0.0605455	0.0925926	0.0888889	-19
0.0882353	0.1625	0.0605455	0.0925926	0.0888889	-19
0.0882353	0.1625	0.0605455	0.0925926	0.0888889	-19
0.0882353	0.1625	0.0605455	0.0925926	0.0888889	-19
0.0882353	0.1625	0.0605455	0.0925926	0.0888889	-19
0.0882353	0.1625	0.0605455	0.0925926	0.0888889	-20
0.0882353	0.1625	0.0605455	0.0925926	0.0888889	-20
0.0882353	0.175	0.0605455	0.0925926	0.0888889	-20
0.0882353	0.175	0.0605455	0.0925926	0.0888889	-20
0.0882353	0.175	0.0605455	0.0925926	0.0888889	-20
0.0882353	0.175	0.0706364	0.0925926	0.0888889	-20
0.0882353	0.175	0.0706364	0.0925926	0.0888889	-20
0.0882353	0.175	0.0706364	0.0925926	0.0888889	-20
0.0882353	0.1875	0.0706364	0.0925926	0.0888889	-20
0.0882353	0.1875	0.0706364	0.0925926	0.0888889	-20
0.0882353	0.1875	0.0706364	0.0925926	0.0888889	-20
0.0882353	0.1875	0.0706364	0.0925926	0.111111	-20
0.0882353	0.1875	0.0706364	0.0925926	0.111111	-20
0.0882353	0.1875	0.0807273	0.0925926	0.111111	-20
0.0882353	0.1875	0.0807273	0.0925926	0.111111	-20
0.0882353	0.1875	0.0807273	0.0925926	0.111111	-20
0.0882353	0.1875	0.0807273	0.0925926	0.111111	-20
0.0882353	0.1875	0.0807273	0.0925926	0.111111	-20
0.0882353	0.1875	0.0807273	0.0925926	0.111111	-20
0.0882353	0.1875	0.0807273	0.0925926	0.111111	-20
0.117647	0.1875	0.0908182	0.0925926	0.133333	-20
0.117647	0.175	0.0908182	0.0925926	0.133333	-20
0.117647	0.175	0.0908182	0.0925926	0.133333	-20
0.117647	0.175	0.0908182	0.0925926	0.133333	-20
0.117647	0.175	0.0908182	0.0925926	0.133333	-20
0.117647	0.175	0.0908182	0.0925926	0.133333	-20
0.117647	0.175	0.100909	0.0925926	0.133333	-20
0.117647	0.175	0.100909	0.0925926	0.133333	-20
0.117647	0.175	0.100909	0.101852	0.133333	-20
0.117647	0.175	0.100909	0.111111	0.133333	-20
0.117647	0.175	0.100909	0.111111	0.133333	-20
0.117647	0.175	0.100909	0.111111	0.133333	-20
0.117647	0.175	0.100909	0.111111	0.133333	-20
0.117647	0.175	0.100909	0.111111	0.133333	-20
0.117647	0.175	0.100909	0.111111	0.133333	-20
0.117647	0.175	0.100909	0.111111	0.133333	-20
0.117647	0.175	0.100909	0.111111	0.133333	-20
0.117647	0.175	0.100909	0.111111	0.133333	-20
0.117647	0.175	0.100909	0.111111	0.133333	-20
0.117647	0.175	0.100909	0.111111	0.133333	-20
0.117647	0.175	0.100909	0.111111	0.133333	-20
0.117647	0.175	0.100909	0.111111	0.133333	-20
0.117647	0.175	0.100909	0.111111	0.133333	-20
0.117647	0.175	0.100909	0.111111	0.133333	-20
0.117647	0.175	0.100909	0.111111	0.133333	-20
0.117647	0.175	0.100909	0.111111	0.133333	-20
0.117647	0.175	0.100909	0.111111	0.133333	-20
0.117647	0.175	0.100909	0.111111	0.133333	-20
0.117647	0.175	0.100909	0.111111	0.133333	-20
0.117647	0.175	0.100909	0.111111	0.133333	-20
0.117647	0.175	0.100909	0.111111	0.133333	-21
0.117647	0.175	0.100909	0.111111	0.133333	-21
0.147059	0.175	0.100909	0.12037	0.133333	-21
0.147059	0.175	0.100909	0.12037	0.133333	-21
0.147059	0.175	0.100909	0.12037	0.133333	-21
0.147059	0.175	0.100909	0.12037	0.133333	-21
0.147059	0.175	0.100909	0.12963	0.133333	-21
0.147059	0.175	0.0908182	0.12963	0.133333	-21
0.147059	0.175	0.0908182	0.12963	0.133333	-21
0.147059	0.175	0.0908182	0.12963	0.133333	-21
0.147059	0.175	0.0908182	0.12963	0.133333	-21
0.147059	0.175	0.0908182	0.12963	0.133333	-21
0.147059	0.175	0.0908182	0.12963	0.133333	-21
0.147059	0.175	0.0908182	0.138889	0.133333	-21
0.147059	0.175	0.0908182	0.138889	0.133333	-21
0.147059	0.1875	0.0908182	0.138889	0.133333	-21
0.147059	0.1875	0.0908182	0.138889	0.133333	-21
0.147059	0.1875	0.0908182	0.138889	0.133333	-21
0.147059	0.1875	0.0908182	0.138889	0.133333	-21
0.147059	0.1875	0.0908182	0.138889	0.133333	-21
0.147059	0.1875	0.0908182	0.138889	0.155556	-21
0.147059	0.1875	0.0908182	0.138889	0.155556	-21
0.147059	0.2	0.0908182	0.138889	0.155556	-21
0.147059	0.2	0.0908182	0.138889	0.155556	-21
0.147059	0.2	0.0908182	0.138889	0.155556	-21
0.147059	0.2	0.0908182	0.138889	0.155556	-21
0.147059	0.2	0.0908182	0.138889	0.155556	-21
0.147059	0.2	0.0908182	0.138889	0.155556	-21
0.147059	0.2	0.0908182	0.138889	0.155556	-21
0.147059	0.2	0.0908182	0.138889	0.155556	-21
0.147059	0.2	0.0908182	0.138889	0.155556	-21
0.147059	0.2	0.0908182	0.138889	0.155556	-21
0.147059	0.2	0.0908182	0.138889	0.155556	-21
0.147059	0.2125	0.0908182	0.138889	0.155556	-21
0.147059	0.2125	0.0908182	0.138889	0.155556	-21
0.147059	0.2125	0.0908182	0.138889	0.155556	-21
0.147059	0.2125	0.0908182	0.138889	0.155556	-21
0.147059	0.2125	0.0908182	0.138889	0.155556	-21
0.147059	0.2375	0.0908182	0.138889	0.155556	-21
0.147059	0.2375	0.0908182	0.138889	0.155556	-21
0.147059	0.2375	0.0908182	0.138889	0.155556	-21
0.147059	0.2375	0.0908182	0.138889	0.155556	-21
0.147059	0.2375	0.0908182	0.138889	0.155556	-21
0.147059	0.2375	0.100909	0.138889	0.155556	-21
0.147059	0.2375	0.100909	0.138889	0.155556	-21
0.147059	0.2375	0.100909	0.138889	0.155556	-21
0.147059	0.2375	0.100909	0.138889	0.155556	-21
0.147059	0.2375	0.100909	0.138889	0.155556	-21
0.147059	0.2375	0.100909	0.138889	0.155556	-21
0.147059	0.2375	0.100909	0.138889	0.155556	-21
0.147059	0.2375	0.100909	0.138889	0.155556	-22
0.147059	0.2375	0.100909	0.148148	0.155556	-22
0.147059	0.2375	0.100909	0.148148	0.2	-22
0.147059	0.25	0.100909	0.148148	0.2	-22
0.147059	0.25	0.100909	0.166667	0.2	-22
0.147059	0.25	0.100909	0.166667	0.2	-22
0.147059	0.25	0.100909	0.166667	0.2	-22
0.147059	0.25	0.100909	0.166667	0.2	-22
0.147059	0.25	0.111	0.166667	0.2	-22
0.147059	0.25	0.121091	0.166667	0.2	-22
0.147059	0.25	0.141303	0.166667	0.2	-22
0.147059	0.25	0.141303	0.166667	0.2	-22
0.147059	0.25	0.141303	0.166667	0.2	-22
0.147059	0.25	0.141303	0.166667	0.2	-22
0.147059	0.25	0.141303	0.166667	0.2	-22
0.147059	0.25	0.141303	0.166667	0.2	-22
0.176471	0.25	0.141303	0.166667	0.2	-22
0.176471	0.25	0.141303	0.166667	0.2	-22
0.176471	0.25	0.141303	0.166667	0.2	-22
0.176471	0.25	0.141303	0.166667	0.2	-22
0.176471	0.25	0.141303	0.166667	0.2	-22
0.176471	0.25	0.141303	0.166667	0.2	-22
0.176471	0.25	0.151394	0.166667	0.2	-22
0.176471	0.25	0.151394	0.166667	0.2	-22
0.176471	0.25	0.151394	0.166667	0.2	-22
0.176471	0.25	0.151394	0.166667	0.2	-22
0.176471	0.25	0.151394	0.166667	0.2	-22
0.176471	0.25	0.151394	0.166667	0.2	-22
0.176471	0.25	0.151394	0.166667	0.2	-22
0.176471	0.25	0.151394	0.166667	0.2	-22
0.176471	0.25	0.151394	0.166667	0.2	-22
0.176471	0.25	0.151394	0.166667	0.2	-22
0.176471	0.25	0.151394	0.166667	0.2	-22
0.176471	0.25	0.151394	0.175926	0.2	-22
0.176471	0.25	0.151394	0.175926	0.2	-22
0.176471	0.25	0.151394	0.175926	0.2	-22
0.176471	0.25	0.151394	0.175926	0.2	-22
0.176471	0.25	0.151394	0.175926	0.2	-22
0.176471	0.25	0.151394	0.175926	0.2	-22
0.176471	0.25	0.151394	0.175926	0.2	-22
0.176471	0.25	0.151394	0.185185	0.2	-22
0.176471	0.2625	0.161515	0.185185	0.2	-22
0.176471	0.2625	0.161515	0.185185	0.2	-22
0.176471	0.2625	0.161515	0.185185	0.2	-22
0.176471	0.2625	0.161515	0.185185	0.2	-22
0.176471	0.2625	0.161515	0.185185	0.2	-22
0.205882	0.2625	0.161515	0.185185	0.2	-22
0.205882	0.2625	0.161515	0.185185	0.2	-22
0.205882	0.2625	0.161515	0.185185	0.2	-22
0.205882	0.2625	0.161515	0.185185	0.2	-22
0.205882	0.275	0.161515	0.185185	0.2	-23
0.205882	0.275	0.161515	0.185185	0.2	-23
0.205882	0.275	0.161515	0.185185	0.2	-23
0.205882	0.275	0.161515	0.185185	0.222222	-23
0.205882	0.275	0.161515	0.185185	0.244444	-23
0.205882	0.275	0.161515	0.185185	0.244444	-23
0.205882	0.2875	0.171606	0.185185	0.244444	-23
0.205882	0.2875	0.171606	0.185185	0.244444	-23
0.205882	0.2875	0.171606	0.185185	0.244444	-23
0.205882	0.2875	0.171606	0.185185	0.244444	-23
0.205882	0.3	0.171606	0.185185	0.244444	-23
0.205882	0.3	0.171606	0.185185	0.244444	-23
0.205882	0.3	0.171606	0.194444	0.244444	-23
0.205882	0.3	0.171606	0.194444	0.244444	-23
0.205882	0.3	0.181697	0.194444	0.244444	-23
0.205882	0.3	0.191788	0.194444	0.266667	-23
0.205882	0.3	0.191788	0.194444	0.266667	-23
0.205882	0.3	0.191788	0.194444	0.266667	-23
0.205882	0.3125	0.191788	0.194444	0.266667	-23
0.205882	0.3125	0.191788	0.194444	0.266667	-23
0.205882	0.3125	0.191788	0.194444	0.266667	-23
0.205882	0.3125	0.191788	0.194444	0.266667	-23
0.205882	0.3125	0.191788	0.194444	0.266667	-23
0.205882	0.3125	0.191788	0.194444	0.266667	-23
0.205882	0.3125	0.191788	0.194444	0.266667	-23
0.205882	0.3125	0.191788	0.194444	0.266667	-23
0.205882	0.3125	0.191788	0.194444	0.266667	-23
0.205882	0.3125	0.191788	0.194444	0.266667	-23
0.205882	0.3125	0.191788	0.194444	0.266667	-23
0.205882	0.3125	0.191788	0.194444	0.266667	-23
0.205882	0.3125	0.191788	0.194444	0.266667	-23
0.205882	0.3125	0.201879	0.194444	0.266667	-23
0.205882	0.3125	0.201879	0.194444	0.266667	-23
0.205882	0.3125	0.201879	0.194444	0.266667	-23
0.205882	0.3125	0.201879	0.194444	0.266667	-23
0.205882	0.3125	0.201879	0.194444	0.266667	-23
0.264706	0.3125	0.201879	0.194444	0.266667	-23
0.264706	0.3125	0.201879	0.194444	0.266667	-23
0.264706	0.3125	0.201879	0.194444	0.266667	-23
0.264706	0.3125	0.201879	0.194444	0.266667	-23
0.264706	0.3125	0.201879	0.194444	0.266667	-23
0.264706	0.3125	0.201879	0.194444	0.266667	-23
0.264706	0.3125	0.201879	0.203704	0.266667	-23
0.264706	0.3125	0.201879	0.203704	0.266667	-23
0.264706	0.3125	0.201879	0.203704	0.266667	-23
0.264706	0.3125	0.201879	0.203704	0.288889	-23
0.264706	0.3125	0.201879	0.212963	0.288889	-23
0.264706	0.3125	0.201879	0.212963	0.288889	-23
0.264706	0.3125	0.201879	0.212963	0.288889	-23
0.264706	0.3125	0.201879	0.212963	0.288889	-23
0.264706	0.3125	0.201879	0.212963	0.288889	-24
0.264706	0.3125	0.201879	0.212963	0.288889	-24
0.264706	0.3125	0.201879	0.212963	0.288889	-24
0.264706	0.3125	0.201879	0.212963	0.288889	-24
0.264706	0.325	0.201879	0.212963	0.288889	-24
0.264706	0.325	0.201879	0.212963	0.288889	-24
0.264706	0.325	0.201879	0.212963	0.288889	-24
0.264706	0.325	0.201879	0.212963	0.288889	-24
0.264706	0.325	0.201879	0.212963	0.288889	-24
0.264706	0.325	0.201879	0.212963	0.288889	-24
0.264706	0.325	0.201879	0.212963	0.288889	-24
0.264706	0.325	0.201879	0.212963	0.288889	-24
0.264706	0.325	0.201879	0.212963	0.288889	-24
0.264706	0.325	0.201879	0.212963	0.288889	-24
0.294118	0.325	0.201879	0.212963	0.288889	-24
0.294118	0.325	0.201879	0.212963	0.288889	-24
0.294118	0.3375	0.201879	0.212963	0.288889	-24
0.294118	0.3375	0.201879	0.231481	0.288889	-24
0.294118	0.3375	0.201879	0.231481	0.288889	-24
0.294118	0.3375	0.201879	0.231481	0.288889	-24
0.294118	0.3375	0.201879	0.231481	0.288889	-24
0.294118	0.3375	0.201879	0.231481	0.288889	-24
0.294118	0.3375	0.201879	0.231481	0.288889	-24
0.294118	0.3375	0.201879	0.240741	0.288889	-24
0.294118	0.3375	0.201879	0.240741	0.288889	-24
0.294118	0.3375	0.201879	0.240741	0.288889	-24
0.294118	0.3375	0.201879	0.240741	0.311111	-24
0.294118	0.3375	0.201879	0.240741	0.311111	-24
0.294118	0.3375	0.201879	0.240741	0.311111	-24
0.294118	0.3375	0.201879	0.240741	0.311111	-24
0.294118	0.35	0.201879	0.240741	0.311111	-24
0.323529	0.35	0.201879	0.240741	0.333333	-24
0.323529	0.35	0.201879	0.240741	0.333333	-24
0.323529	0.35	0.201879	0.240741	0.333333	-24
0.323529	0.35	0.201879	0.240741	0.333333	-24
0.323529	0.35	0.201879	0.240741	0.333333	-24
0.323529	0.35	0.201879	0.240741	0.333333	-24
0.323529	0.35	0.201879	0.240741	0.333333	-24
0.352941	0.35	0.201879	0.240741	0.333333	-24
0.352941	0.35	0.201879	0.25	0.333333	-24
0.352941	0.35	0.201879	0.25	0.333333	-24
0.352941	0.35	0.201879	0.25	0.333333	-24
0.352941	0.35	0.201879	0.25	0.333333	-24
0.352941	0.35	0.21197	0.25	0.333333	-24
0.352941	0.35	0.21197	0.25	0.333333	-24
0.352941	0.35	0.21197	0.25	0.333333	-24
0.352941	0.35	0.222091	0.259259	0.333333	-24
0.352941	0.35	0.222091	0.259259	0.333333	-24
0.352941	0.3625	0.232182	0.259259	0.333333	-24
0.352941	0.3625	0.232182	0.259259	0.333333	-24
0.352941	0.375	0.232182	0.259259	0.333333	-25
0.352941	0.375	0.232182	0.259259	0.333333	-25
0.352941	0.375	0.232182	0.259259	0.333333	-25
0.352941	0.375	0.232182	0.259259	0.333333	-25
0.352941	0.3875	0.232182	0.259259	0.333333	-25
0.352941	0.3875	0.232182	0.259259	0.333333	-25
0.352941	0.3875	0.232182	0.259259	0.333333	-25
0.352941	0.3875	0.232182	0.259259	0.333333	-25
0.352941	0.3875	0.242273	0.259259	0.333333	-25
0.352941	0.3875	0.242273	0.259259	0.333333	-25
0.352941	0.3875	0.242273	0.259259	0.333333	-25
0.352941	0.3875	0.242273	0.259259	0.333333	-25
0.352941	0.3875	0.242273	0.259259	0.333333	-25
0.352941	0.3875	0.242273	0.259259	0.333333	-25
0.352941	0.3875	0.242273	0.259259	0.333333	-25
0.352941	0.3875	0.242273	0.259259	0.333333	-25
0.352941	0.3875	0.242273	0.259259	0.333333	-25
0.352941	0.3875	0.242273	0.259259	0.333333	-25
0.352941	0.3875	0.242273	0.259259	0.333333	-25
0.352941	0.3875	0.242273	0.259259	0.333333	-25
0.352941	0.3875	0.252364	0.259259	0.333333	-25
0.382353	0.3875	0.252364	0.259259	0.333333	-25
0.382353	0.3875	0.252364	0.259259	0.355556	-25
0.382353	0.3875	0.252364	0.259259	0.355556	-25
0.382353	0.3875	0.252364	0.259259	0.355556	-25
0.352941	0.3875	0.252364	0.259259	0.355556	-25
0.352941	0.3875	0.252364	0.259259	0.355556	-25
0.352941	0.3875	0.252364	0.259259	0.355556	-25
0.352941	0.4	0.252364	0.259259	0.355556	-25
0.352941	0.4	0.252364	0.259259	0.355556	-25
0.352941	0.4	0.252364	0.268519	0.355556	-25
0.352941	0.4	0.252364	0.268519	0.355556	-25
0.352941	0.4	0.252364	0.268519	0.355556	-25
0.352941	0.4	0.252364	0.268519	0.355556	-25
0.352941	0.4	0.252364	0.268519	0.355556	-25
0.352941	0.4	0.252364	0.268519	0.377778	-25
0.352941	0.4	0.262485	0.268519	0.377778	-25
0.352941	0.4	0.262485	0.277778	0.377778	-25
0.352941	0.4	0.262485	0.277778	0.377778	-25
0.352941	0.4	0.262485	0.277778	0.377778	-25
0.352941	0.4	0.262485	0.277778	0.377778	-25
0.352941	0.4	0.262485	0.277778	0.377778	-25
0.352941	0.4	0.262485	0.277778	0.377778	-25
0.352941	0.4	0.262485	0.287037	0.377778	-25
0.352941	0.4	0.262485	0.287037	0.377778	-25
0.352941	0.4	0.262485	0.287037	0.377778	-25
0.352941	0.4	0.262485	0.287037	0.377778	-25
0.352941	0.4	0.272576	0.287037	0.377778	-25
0.352941	0.4	0.272576	0.287037	0.377778	-25
0.352941	0.4	0.272576	0.287037	0.377778	-25
0.352941	0.4	0.272576	0.287037	0.377778	-26
0.352941	0.4	0.272576	0.287037	0.377778	-26
0.352941	0.4	0.282697	0.296296	0.377778	-26
0.352941	0.4	0.282697	0.305556	0.4	-26
0.352941	0.4	0.282697	0.305556	0.4	-26
0.352941	0.4	0.282697	0.305556	0.4	-26
0.352941	0.4	0.282697	0.305556	0.4	-26
0.352941	0.4	0.282697	0.305556	0.4	-26
0.352941	0.4	0.282697	0.314815	0.4	-26
0.352941	0.4	0.282697	0.314815	0.4	-26
0.352941	0.4125	0.282697	0.314815	0.4	-26
0.352941	0.4125	0.282697	0.314815	0.4	-26
0.352941	0.4125	0.282697	0.314815	0.4	-26
0.352941	0.4125	0.282697	0.314815	0.4	-26
0.352941	0.4125	0.282697	0.314815	0.4	-26
0.352941	0.4125	0.282697	0.314815	0.4	-26
0.352941	0.4125	0.282697	0.314815	0.4	-26
0.352941	0.4125	0.282697	0.314815	0.4	-26
0.352941	0.4125	0.282697	0.314815	0.4	-26
0.352941	0.425	0.282697	0.314815	0.4	-26
0.352941	0.425	0.292788	0.314815	0.4	-26
0.352941	0.425	0.292788	0.314815	0.4	-26
0.352941	0.425	0.292788	0.314815	0.4	-26
0.352941	0.425	0.292788	0.314815	0.422222	-26
0.382353	0.425	0.292788	0.314815	0.444444	-26
0.382353	0.4375	0.292788	0.314815	0.444444	-26
0.382353	0.4375	0.292788	0.314815	0.444444	-26
0.382353	0.4375	0.292788	0.314815	0.444444	-26
0.382353	0.4375	0.302879	0.314815	0.444444	-26
0.382353	0.4375	0.302879	0.324074	0.444444	-26
0.382353	0.4375	0.302879	0.324074	0.444444	-26
0.382353	0.4375	0.302879	0.324074	0.444444	-26
0.382353	0.45	0.302879	0.324074	0.444444	-26
0.382353	0.45	0.302879	0.324074	0.444444	-26
0.382353	0.45	0.302879	0.324074	0.444444	-26
0.382353	0.45	0.302879	0.324074	0.444444	-26
0.382353	0.45	0.302879	0.324074	0.444444	-26
0.382353	0.45	0.302879	0.324074	0.444444	-26
0.382353	0.4625	0.302879	0.324074	0.444444	-26
0.382353	0.4625	0.302879	0.324074	0.444444	-26
0.382353	0.4625	0.302879	0.324074	0.444444	-26
0.382353	0.4625	0.302879	0.324074	0.444444	-26
0.382353	0.4625	0.302879	0.324074	0.444444	-26
0.382353	0.475	0.302879	0.324074	0.444444	-26
0.382353	0.475	0.302879	0.333333	0.466667	-26
0.382353	0.475	0.302879	0.333333	0.466667	-26
0.382353	0.475	0.302879	0.333333	0.466667	-26
0.382353	0.475	0.302879	0.333333	0.466667	-26
0.382353	0.475	0.302879	0.333333	0.466667	-26
0.382353	0.475	0.31297	0.333333	0.466667	-26
0.382353	0.475	0.31297	0.333333	0.466667	-27
0.382353	0.475	0.31297	0.333333	0.466667	-27
0.382353	0.475	0.31297	0.333333	0.466667	-27
0.382353	0.475	0.31297	0.333333	0.466667	-27
0.382353	0.475	0.323061	0.333333	0.466667	-27
0.382353	0.475	0.323061	0.333333	0.466667	-27
0.382353	0.475	0.323061	0.333333	0.466667	-27
0.382353	0.475	0.323061	0.333333	0.466667	-27
0.382353	0.475	0.323061	0.333333	0.466667	-27
0.382353	0.475	0.333152	0.333333	0.466667	-27
0.382353	0.475	0.333152	0.333333	0.466667	-27
0.382353	0.475	0.333152	0.333333	0.466667	-27
0.382353	0.4875	0.333152	0.333333	0.466667	-27
0.411765	0.4875	0.333152	0.333333	0.466667	-27
0.411765	0.5	0.343242	0.333333	0.466667	-27
0.441176	0.5	0.343242	0.333333	0.466667	-27
0.441176	0.5125	0.343242	0.333333	0.466667	-27
0.441176	0.525	0.343242	0.333333	0.466667	-27
0.441176	0.525	0.343242	0.333333	0.466667	-27
0.441176	0.525	0.353333	0.333333	0.466667	-27
0.441176	0.525	0.353333	0.333333	0.466667	-27
0.441176	0.525	0.353333	0.333333	0.466667	-27
0.441176	0.525	0.353333	0.333333	0.488889	-27
0.441176	0.525	0.353333	0.333333	0.488889	-27
0.441176	0.525	0.353333	0.333333	0.488889	-27
0.441176	0.525	0.353333	0.333333	0.488889	-27
0.441176	0.525	0.353333	0.333333	0.488889	-27
0.441176	0.525	0.353333	0.333333	0.488889	-27
0.441176	0.525	0.353333	0.333333	0.488889	-27
0.441176	0.525	0.353333	0.333333	0.488889	-27
0.470588	0.525	0.353333	0.333333	0.488889	-27
0.470588	0.525	0.353333	0.351852	0.488889	-27
0.5	0.525	0.353333	0.351852	0.488889	-27
0.5	0.5375	0.373515	0.351852	0.488889	-27
0.5	0.5375	0.373515	0.351852	0.488889	-27
0.5	0.5375	0.373515	0.342593	0.488889	-27
0.5	0.5375	0.373515	0.342593	0.488889	-27
0.5	0.5375	0.373515	0.342593	0.488889	-27
0.5	0.5375	0.373515	0.342593	0.488889	-27
0.5	0.5375	0.373515	0.342593	0.488889	-27
0.5	0.5375	0.373515	0.342593	0.488889	-27
0.5	0.5375	0.373515	0.342593	0.488889	-27
0.529412	0.5375	0.373515	0.342593	0.488889	-27
0.529412	0.5375	0.383606	0.342593	0.488889	-27
0.529412	0.5375	0.383606	0.342593	0.488889	-27
0.529412	0.5375	0.383606	0.342593	0.488889	-27
0.529412	0.5375	0.383606	0.342593	0.488889	-27
0.529412	0.5375	0.383606	0.342593	0.488889	-27
0.529412	0.5375	0.383606	0.351852	0.488889	-27
0.529412	0.5375	0.383606	0.351852	0.511111	-27
0.529412	0.5375	0.383606	0.361111	0.511111	-28
0.529412	0.5375	0.383606	0.361111	0.511111	-28
0.529412	0.5375	0.383606	0.361111	0.511111	-28
0.529412	0.5375	0.393727	0.361111	0.511111	-28
0.529412	0.5375	0.393727	0.361111	0.511111	-28
0.529412	0.5375	0.393727	0.37037	0.511111	-28
0.529412	0.5375	0.393727	0.37037	0.511111	-28
0.529412	0.5375	0.393727	0.37037	0.511111	-28
0.529412	0.5375	0.403818	0.37037	0.511111	-28
0.558824	0.5375	0.403818	0.37037	0.511111	-28
0.558824	0.5375	0.403818	0.37963	0.511111	-28
0.558824	0.5375	0.403818	0.37963	0.511111	-28
0.558824	0.5375	0.403818	0.37963	0.511111	-28
0.558824	0.5375	0.403818	0.37963	0.511111	-28
0.558824	0.5375	0.403818	0.37963	0.511111	-28
0.558824	0.5375	0.403818	0.37963	0.511111	-28
0.558824	0.5375	0.403818	0.37963	0.511111	-28
0.558824	0.5375	0.403818	0.388889	0.511111	-28
0.558824	0.5375	0.403818	0.388889	0.511111	-28
0.558824	0.55	0.403818	0.388889	0.511111	-28
0.558824	0.55	0.403818	0.388889	0.511111	-28
0.558824	0.55	0.403818	0.388889	0.533333	-28
0.558824	0.55	0.403818	0.388889	0.555556	-28
0.558824	0.55	0.403818	0.388889	0.555556	-28
0.558824	0.55	0.403818	0.388889	0.555556	-28
0.558824	0.55	0.403818	0.388889	0.555556	-28
0.558824	0.55	0.403818	0.388889	0.555556	-28
0.558824	0.55	0.403818	0.388889	0.555556	-28
0.558824	0.55	0.403818	0.388889	0.555556	-28
0.558824	0.55	0.403818	0.388889	0.555556	-28
0.558824	0.55	0.403818	0.388889	0.555556	-28
0.558824	0.55	0.403818	0.388889	0.555556	-28
0.558824	0.55	0.403818	0.388889	0.555556	-28
0.558824	0.5625	0.403818	0.398148	0.555556	-28
0.558824	0.5625	0.403818	0.407407	0.555556	-28
0.558824	0.5625	0.403818	0.407407	0.555556	-28
0.558824	0.5625	0.403818	0.407407	0.555556	-28
0.558824	0.5625	0.403818	0.407407	0.577778	-28
0.588235	0.5625	0.403818	0.407407	0.577778	-28
0.588235	0.5625	0.403818	0.407407	0.577778	-28
0.588235	0.5625	0.403818	0.407407	0.577778	-28
0.588235	0.5625	0.403818	0.407407	0.577778	-28
0.588235	0.5625	0.413939	0.407407	0.577778	-28
0.588235	0.5625	0.413939	0.407407	0.577778	-28
0.588235	0.5625	0.413939	0.407407	0.577778	-28
0.588235	0.5625	0.413939	0.407407	0.577778	-28
0.588235	0.5625	0.413939	0.416667	0.577778	-28
0.588235	0.575	0.403818	0.416667	0.577778	-28
0.588235	0.575	0.403818	0.416667	0.577778	-28
0.588235	0.575	0.403818	0.425926	0.577778	-28
0.588235	0.575	0.403818	0.425926	0.577778	-29
0.588235	0.575	0.413909	0.425926	0.577778	-29
0.588235	0.575	0.424	0.425926	0.577778	-29
0.588235	0.575	0.424	0.425926	0.577778	-29
0.588235	0.575	0.424	0.425926	0.577778	-29
0.588235	0.575	0.424	0.425926	0.577778	-29
0.588235	0.575	0.424	0.435185	0.577778	-29
0.617647	0.575	0.424	0.435185	0.577778	-29
0.617647	0.575	0.424	0.435185	0.577778	-29
0.617647	0.575	0.424	0.444444	0.577778	-29
0.617647	0.575	0.424	0.444444	0.577778	-29
0.617647	0.575	0.424	0.444444	0.577778	-29
0.617647	0.575	0.434121	0.444444	0.577778	-29
0.617647	0.575	0.434121	0.444444	0.577778	-29
0.617647	0.5875	0.434121	0.444444	0.577778	-29
0.617647	0.5875	0.434121	0.453704	0.577778	-29
0.617647	0.5875	0.434121	0.453704	0.577778	-29
0.617647	0.5875	0.434121	0.453704	0.577778	-29
0.647059	0.5875	0.434121	0.453704	0.6	-29
0.647059	0.5875	0.434121	0.453704	0.6	-29
0.647059	0.5875	0.434121	0.462963	0.6	-29
0.647059	0.5875	0.434121	0.462963	0.6	-29
0.647059	0.5875	0.444212	0.462963	0.6	-29
0.647059	0.5875	0.444212	0.462963	0.6	-29
0.647059	0.5875	0.454303	0.462963	0.6	-29
0.647059	0.5875	0.454303	0.462963	0.6	-29
0.647059	0.5875	0.454303	0.462963	0.6	-29
0.647059	0.5875	0.464394	0.462963	0.6	-29
0.647059	0.5875	0.464394	0.462963	0.6	-29
0.647059	0.5875	0.464394	0.462963	0.6	-29
0.647059	0.5875	0.464394	0.462963	0.6	-29
0.647059	0.5875	0.464394	0.462963	0.6	-29
0.647059	0.5875	0.464394	0.462963	0.6	-29
0.647059	0.5875	0.464394	0.462963	0.6	-29
0.647059	0.5875	0.464394	0.462963	0.6	-29
0.647059	0.5875	0.474485	0.462963	0.6	-29
0.647059	0.5875	0.474485	0.472222	0.6	-29
0.647059	0.5875	0.474485	0.481481	0.6	-29
0.647059	0.6	0.474485	0.481481	0.6	-29
0.647059	0.6	0.474485	0.481481	0.6	-29
0.647059	0.6	0.474485	0.481481	0.6	-29
0.617647	0.6	0.474485	0.481481	0.6	-29
0.617647	0.6	0.474485	0.481481	0.6	-29
0.617647	0.6	0.474485	0.481481	0.6	-29
0.617647	0.6	0.474485	0.481481	0.6	-29
0.617647	0.6	0.474485	0.481481	0.6	-29
0.617647	0.6	0.474485	0.481481	0.6	-29
0.617647	0.6	0.474485	0.462963	0.6	-29
0.617647	0.6	0.474485	0.490741	0.6	-29
0.617647	0.6	0.474485	0.490741	0.6	-29
0.617647	0.6	0.474485	0.490741	0.6	-30
0.617647	0.6	0.474485	0.5	0.6	-30
0.617647	0.6	0.474485	0.5	0.6	-30
0.617647	0.6	0.474485	0.5	0.6	-30
0.617647	0.6	0.474485	0.509259	0.6	-30
0.617647	0.6125	0.474485	0.509259	0.6	-30
0.617647	0.6125	0.474485	0.518519	0.6	-30
0.617647	0.6125	0.474485	0.518519	0.6	-30
0.617647	0.6125	0.474485	0.518519	0.6	-30
0.617647	0.6125	0.474485	0.518519	0.6	-30
0.617647	0.6125	0.474485	0.518519	0.6	-30
0.617647	0.6125	0.474485	0.518519	0.6	-30
0.617647	0.6125	0.474485	0.518519	0.6	-30
0.617647	0.6125	0.474485	0.518519	0.6	-30
0.617647	0.6125	0.474485	0.518519	0.6	-30
0.617647	0.6125	0.484576	0.518519	0.6	-30
0.617647	0.6125	0.484576	0.527778	0.6	-30
0.588235	0.6125	0.484576	0.527778	0.6	-30
0.588235	0.6125	0.484576	0.546296	0.6	-30
0.588235	0.6125	0.484576	0.546296	0.6	-30
0.588235	0.6125	0.484576	0.546296	0.6	-30
0.588235	0.6125	0.484576	0.546296	0.6	-30
0.588235	0.6125	0.484576	0.546296	0.6	-30
0.588235	0.6125	0.494667	0.555556	0.6	-30
0.617647	0.6125	0.494667	0.555556	0.6	-30
0.617647	0.6125	0.494667	0.555556	0.6	-30
0.617647	0.6125	0.494667	0.555556	0.622222	-30
0.617647	0.6125	0.494667	0.555556	0.622222	-30
0.617647	0.6125	0.494667	0.555556	0.622222	-30
0.617647	0.6125	0.494667	0.555556	0.622222	-30
0.617647	0.6125	0.494667	0.555556	0.622222	-30
0.617647	0.6125	0.494667	0.555556	0.622222	-30
0.617647	0.6125	0.494667	0.564815	0.622222	-30
0.617647	0.6125	0.494667	0.574074	0.622222	-30
0.617647	0.6125	0.494667	0.574074	0.622222	-30
0.617647	0.6125	0.494667	0.574074	0.622222	-30
0.617647	0.6125	0.494667	0.574074	0.622222	-30
0.647059	0.6125	0.494667	0.574074	0.622222	-30
0.647059	0.6125	0.494667	0.574074	0.622222	-30
0.647059	0.6125	0.494667	0.574074	0.622222	-30
0.647059	0.6125	0.504788	0.574074	0.622222	-30
0.647059	0.6125	0.504788	0.574074	0.622222	-30
0.647059	0.6125	0.504788	0.574074	0.622222	-30
0.647059	0.6125	0.504788	0.574074	0.622222	-30
0.647059	0.6125	0.514879	0.574074	0.622222	-30
0.647059	0.6125	0.514879	0.574074	0.622222	-30
0.647059	0.6125	0.514879	0.574074	0.622222	-30
0.647059	0.6125	0.514879	0.574074	0.622222	-30
0.647059	0.6125	0.514879	0.574074	0.622222	-30
0.647059	0.6125	0.514879	0.574074	0.622222	-30
0.647059	0.6125	0.514879	0.574074	0.622222	-31
0.647059	0.6125	0.514879	0.574074	0.622222	-31
0.647059	0.6125	0.514879	0.574074	0.622222	-31
0.647059	0.6125	0.514879	0.574074	0.622222	-31
0.647059	0.6125	0.514879	0.574074	0.644444	-31
0.647059	0.6125	0.514879	0.574074	0.644444	-31
0.647059	0.6125	0.514879	0.574074	0.644444	-31
0.647059	0.6125	0.514879	0.574074	0.644444	-31
0.647059	0.6125	0.514879	0.574074	0.644444	-31
0.647059	0.6125	0.514879	0.574074	0.644444	-31
0.647059	0.6125	0.514879	0.574074	0.644444	-31
0.647059	0.6125	0.514879	0.574074	0.644444	-31
0.647059	0.6125	0.514879	0.574074	0.644444	-31
0.647059	0.6125	0.514879	0.574074	0.644444	-31
0.647059	0.6125	0.514879	0.574074	0.666667	-31
0.647059	0.6125	0.52497	0.574074	0.666667	-31
0.647059	0.6125	0.52497	0.574074	0.666667	-31
0.647059	0.6125	0.52497	0.574074	0.666667	-31
0.647059	0.6125	0.52497	0.574074	0.666667	-31
0.647059	0.6125	0.52497	0.583333	0.666667	-31
0.647059	0.6125	0.52497	0.583333	0.666667	-31
0.647059	0.6125	0.52497	0.583333	0.666667	-31
0.647059	0.6125	0.52497	0.583333	0.666667	-31
0.647059	0.6125	0.52497	0.583333	0.666667	-31
0.647059	0.6125	0.52497	0.583333	0.666667	-31
0.647059	0.6125	0.52497	0.583333	0.666667	-31
0.647059	0.6125	0.52497	0.592593	0.666667	-31
0.647059	0.6125	0.52497	0.592593	0.666667	-31
0.647059	0.6125	0.52497	0.592593	0.666667	-31
0.647059	0.6125	0.52497	0.592593	0.666667	-31
0.647059	0.6125	0.52497	0.601852	0.666667	-31
0.647059	0.6125	0.52497	0.601852	0.666667	-31
0.647059	0.6125	0.52497	0.601852	0.666667	-31
0.647059	0.6125	0.52497	0.601852	0.666667	-31
0.647059	0.625	0.52497	0.601852	0.666667	-31
0.647059	0.625	0.52497	0.601852	0.666667	-31
0.647059	0.625	0.535061	0.601852	0.666667	-31
0.647059	0.6375	0.535061	0.601852	0.666667	-31
0.647059	0.6375	0.535061	0.601852	0.666667	-31
0.647059	0.6375	0.535061	0.601852	0.666667	-31
0.647059	0.6375	0.535061	0.601852	0.666667	-31
0.647059	0.6375	0.535061	0.601852	0.666667	-31
0.647059	0.6375	0.535061	0.601852	0.666667	-31
0.647059	0.6375	0.545152	0.611111	0.666667	-31
0.647059	0.6375	0.545152	0.611111	0.666667	-31
0.647059	0.6375	0.545152	0.611111	0.666667	-31
0.647059	0.6375	0.545152	0.62037	0.666667	-31
0.647059	0.6375	0.545152	0.62037	0.666667	-31
0.647059	0.6375	0.545152	0.62037	0.666667	-31
0.647059	0.6375	0.545152	0.62037	0.666667	-31
0.647059	0.65	0.545152	0.62037	0.666667	-32
0.647059	0.65	0.545152	0.62037	0.666667	-32
0.647059	0.6625	0.545152	0.62037	0.666667	-32
0.647059	0.6625	0.545152	0.62037	0.666667	-32
0.647059	0.6625	0.545152	0.62037	0.666667	-32
0.647059	0.6625	0.545152	0.62037	0.666667	-32
0.647059	0.6625	0.545152	0.62037	0.666667	-32
0.647059	0.6625	0.545152	0.62037	0.666667	-32
0.647059	0.6625	0.545152	0.62037	0.666667	-32
0.617647	0.6625	0.545152	0.62037	0.666667	-32
0.617647	0.6625	0.545152	0.62037	0.666667	-32
0.617647	0.6625	0.545152	0.62037	0.666667	-32
0.617647	0.6625	0.545152	0.62037	0.666667	-32
0.617647	0.6625	0.545152	0.62037	0.688889	-32
0.617647	0.6625	0.545152	0.62037	0.688889	-32
0.617647	0.6625	0.545152	0.62037	0.688889	-32
0.647059	0.6625	0.545152	0.62037	0.688889	-32
0.647059	0.6625	0.545152	0.62037	0.688889	-32
0.647059	0.675	0.545152	0.62963	0.688889	-32
0.647059	0.675	0.545152	0.62963	0.688889	-32
0.647059	0.6875	0.545152	0.648148	0.688889	-32
0.647059	0.6875	0.545152	0.648148	0.688889	-32
0.647059	0.6875	0.545152	0.648148	0.688889	-32
0.647059	0.6875	0.545152	0.648148	0.688889	-32
0.647059	0.6875	0.555242	0.648148	0.688889	-32
0.647059	0.6875	0.555242	0.648148	0.688889	-32
0.647059	0.6875	0.555242	0.62963	0.688889	-32
0.647059	0.6875	0.555242	0.62963	0.688889	-32
0.647059	0.6875	0.555242	0.62963	0.688889	-32
0.676471	0.6875	0.555242	0.62963	0.688889	-32
0.676471	0.6875	0.555242	0.62963	0.688889	-32
0.676471	0.6875	0.555242	0.62963	0.688889	-32
0.676471	0.6875	0.555242	0.62963	0.688889	-32
0.676471	0.6875	0.555242	0.638889	0.688889	-32
0.676471	0.6875	0.555242	0.638889	0.688889	-32
0.676471	0.6875	0.555242	0.638889	0.688889	-32
0.705882	0.6875	0.555242	0.638889	0.688889	-32
0.705882	0.6875	0.555242	0.638889	0.688889	-32
0.705882	0.6875	0.555242	0.638889	0.688889	-32
0.735294	0.6875	0.555242	0.638889	0.688889	-32
0.735294	0.6875	0.555242	0.638889	0.688889	-32
0.735294	0.6875	0.555242	0.648148	0.688889	-32
0.735294	0.6875	0.555242	0.648148	0.688889	-32
0.735294	0.6875	0.555242	0.648148	0.688889	-32
0.735294	0.6875	0.555242	0.648148	0.688889	-32
0.735294	0.6875	0.555242	0.648148	0.688889	-32
0.735294	0.6875	0.555242	0.648148	0.688889	-32
0.735294	0.6875	0.555242	0.648148	0.688889	-32
0.735294	0.6875	0.555242	0.648148	0.688889	-32
0.735294	0.6875	0.555242	0.648148	0.688889	-32
0.735294	0.6875	0.555242	0.648148	0.688889	-33
0.735294	0.6875	0.555242	0.648148	0.688889	-33
0.735294	0.6875	0.555242	0.657407	0.688889	-33
0.735294	0.6875	0.555242	0.657407	0.688889	-33
0.735294	0.6875	0.555242	0.657407	0.688889	-33
0.735294	0.6875	0.555242	0.666667	0.688889	-33
0.735294	0.6875	0.555242	0.666667	0.688889	-33
0.735294	0.6875	0.555242	0.666667	0.688889	-33
0.735294	0.6875	0.565333	0.666667	0.688889	-33
0.735294	0.6875	0.565333	0.666667	0.688889	-33
0.764706	0.6875	0.565333	0.666667	0.688889	-33
0.764706	0.6875	0.565333	0.666667	0.688889	-33
0.764706	0.6875	0.565333	0.666667	0.688889	-33
0.764706	0.6875	0.565333	0.666667	0.688889	-33
0.764706	0.6875	0.565333	0.666667	0.688889	-33
0.764706	0.6875	0.565333	0.666667	0.688889	-33
0.764706	0.6875	0.565333	0.666667	0.688889	-33
0.764706	0.6875	0.565333	0.666667	0.688889	-33
0.764706	0.6875	0.565333	0.666667	0.688889	-33
0.764706	0.6875	0.565333	0.666667	0.688889	-33
0.764706	0.6875	0.565333	0.666667	0.688889	-33
0.764706	0.6875	0.565333	0.666667	0.688889	-33
0.764706	0.6875	0.565333	0.666667	0.688889	-33
0.764706	0.6875	0.565333	0.666667	0.688889	-33
0.764706	0.6875	0.565333	0.666667	0.688889	-33
0.764706	0.6875	0.565333	0.657407	0.688889	-33
0.764706	0.6875	0.565333	0.657407	0.688889	-33
0.764706	0.6875	0.565333	0.666667	0.688889	-33
0.764706	0.6875	0.565333	0.666667	0.688889	-33
0.764706	0.6875	0.585545	0.666667	0.688889	-33
0.764706	0.6875	0.585545	0.666667	0.688889	-33
0.764706	0.6875	0.585545	0.666667	0.688889	-33
0.764706	0.6875	0.585545	0.666667	0.688889	-33
0.764706	0.6875	0.585545	0.666667	0.688889	-33
0.764706	0.6875	0.585545	0.666667	0.688889	-33
0.764706	0.7	0.585545	0.675926	0.688889	-33
0.764706	0.7	0.595636	0.675926	0.688889	-33
0.764706	0.7	0.595636	0.675926	0.688889	-33
0.764706	0.7	0.595636	0.675926	0.688889	-33
0.764706	0.7	0.595636	0.675926	0.688889	-33
0.764706	0.7	0.595636	0.675926	0.688889	-33
0.764706	0.7	0.595636	0.675926	0.688889	-33
0.764706	0.7	0.595636	0.675926	0.688889	-33
0.764706	0.7	0.595636	0.675926	0.688889	-33
0.764706	0.7	0.595636	0.685185	0.688889	-33
0.764706	0.7	0.595636	0.685185	0.688889	-33
0.764706	0.7	0.595636	0.685185	0.688889	-33
0.764706	0.7	0.605758	0.685185	0.688889	-33
0.764706	0.7	0.605758	0.685185	0.688889	-33
0.764706	0.7	0.605758	0.694444	0.688889	-33
0.764706	0.7	0.605758	0.694444	0.688889	-34
0.764706	0.7	0.605758	0.694444	0.688889	-34
0.764706	0.7	0.605758	0.694444	0.688889	-34
0.764706	0.7	0.605758	0.694444	0.688889	-34
0.764706	0.7	0.605758	0.694444	0.688889	-34
0.764706	0.7	0.605758	0.694444	0.688889	-34
0.764706	0.7	0.605758	0.694444	0.688889	-34
0.764706	0.7	0.605758	0.694444	0.688889	-34
0.764706	0.7	0.605758	0.694444	0.688889	-34
0.764706	0.7	0.605758	0.694444	0.688889	-34
0.764706	0.7	0.605758	0.703704	0.688889	-34
0.764706	0.7	0.605758	0.703704	0.688889	-34
0.794118	0.7	0.605758	0.703704	0.688889	-34
0.794118	0.7	0.605758	0.703704	0.688889	-34
0.794118	0.7	0.605758	0.703704	0.688889	-34
0.794118	0.7	0.615848	0.703704	0.688889	-34
0.794118	0.7	0.615848	0.703704	0.688889	-34
0.794118	0.7	0.615848	0.703704	0.688889	-34
0.794118	0.7	0.615848	0.703704	0.711111	-34
0.794118	0.7	0.615848	0.703704	0.711111	-34
0.794118	0.7	0.615848	0.703704	0.711111	-34
0.794118	0.7	0.615848	0.703704	0.711111	-34
0.794118	0.7	0.615848	0.703704	0.711111	-34
0.794118	0.7	0.615848	0.703704	0.711111	-34
0.794118	0.7	0.615848	0.703704	0.711111	-34
0.794118	0.7	0.615848	0.703704	0.711111	-34
0.794118	0.7	0.615848	0.703704	0.711111	-34
0.794118	0.7	0.615848	0.703704	0.711111	-34
0.794118	0.6875	0.615848	0.703704	0.711111	-34
0.794118	0.6875	0.615848	0.703704	0.711111	-34
0.794118	0.6875	0.615848	0.703704	0.733333	-34
0.794118	0.7	0.615848	0.703704	0.733333	-34
0.794118	0.7	0.615848	0.703704	0.733333	-34
0.794118	0.7	0.615848	0.703704	0.733333	-34
0.794118	0.7	0.615848	0.703704	0.733333	-34
0.794118	0.7	0.615848	0.703704	0.733333	-34
0.794118	0.7	0.615848	0.703704	0.733333	-34
0.794118	0.7	0.615848	0.703704	0.733333	-34
0.794118	0.7	0.615848	0.703704	0.733333	-34
0.794118	0.7	0.615848	0.703704	0.733333	-34
0.794118	0.7	0.615848	0.703704	0.733333	-34
0.794118	0.7	0.615848	0.703704	0.733333	-34
0.794118	0.7125	0.615848	0.703704	0.733333	-34
0.794118	0.7125	0.615848	0.703704	0.733333	-34
0.794118	0.7125	0.615848	0.703704	0.733333	-34
0.794118	0.7125	0.615848	0.703704	0.733333	-34
0.794118	0.7125	0.615848	0.703704	0.733333	-34
0.794118	0.7125	0.615848	0.703704	0.733333	-34
0.794118	0.7125	0.615848	0.703704	0.733333	-34
0.794118	0.7125	0.615848	0.703704	0.733333	-34
0.794118	0.7125	0.615848	0.703704	0.733333	-35
0.794118	0.7125	0.615848	0.703704	0.733333	-35
0.794118	0.7125	0.615848	0.703704	0.733333	-35
0.794118	0.7125	0.615848	0.703704	0.733333	-35
0.794118	0.7125	0.615848	0.703704	0.733333	-35
0.794118	0.7125	0.615848	0.703704	0.733333	-35
0.794118	0.7125	0.615848	0.712963	0.733333	-35
0.794118	0.7125	0.615848	0.712963	0.733333	-35
0.794118	0.7125	0.615848	0.712963	0.733333	-35
0.794118	0.7125	0.615848	0.712963	0.733333	-35
0.794118	0.7125	0.615848	0.712963	0.755556	-35
0.794118	0.7125	0.62597	0.712963	0.755556	-35
0.794118	0.7125	0.62597	0.722222	0.755556	-35
0.794118	0.7125	0.62597	0.731481	0.755556	-35
0.794118	0.7125	0.62597	0.731481	0.755556	-35
0.794118	0.7125	0.62597	0.731481	0.755556	-35
0.794118	0.7125	0.62597	0.731481	0.755556	-35
0.794118	0.7125	0.62597	0.731481	0.755556	-35
0.794118	0.7125	0.62597	0.731481	0.755556	-35
0.794118	0.7125	0.62597	0.731481	0.777778	-35
0.794118	0.7125	0.62597	0.740741	0.777778	-35
0.794118	0.7125	0.62597	0.740741	0.777778	-35
0.794118	0.7125	0.62597	0.740741	0.777778	-35
0.794118	0.7125	0.62597	0.740741	0.777778	-35
0.794118	0.7125	0.62597	0.740741	0.777778	-35
0.794118	0.7125	0.62597	0.740741	0.777778	-35
0.794118	0.7125	0.62597	0.740741	0.777778	-35
0.794118	0.7125	0.62597	0.740741	0.777778	-35
0.794118	0.7125	0.62597	0.740741	0.777778	-35
0.794118	0.7125	0.62597	0.740741	0.777778	-35
0.794118	0.7125	0.636061	0.75	0.777778	-35
0.794118	0.7125	0.636061	0.75	0.777778	-35
0.794118	0.7125	0.636061	0.75	0.777778	-35
0.794118	0.7125	0.636061	0.75	0.777778	-35
0.794118	0.7125	0.646152	0.75	0.777778	-35
0.794118	0.7125	0.646152	0.75	0.777778	-35
0.794118	0.7125	0.656242	0.740741	0.777778	-35
0.794118	0.7125	0.656242	0.75	0.777778	-35
0.794118	0.7125	0.656242	0.75	0.777778	-35
0.794118	0.7125	0.656242	0.75	0.777778	-35
0.794118	0.7125	0.656242	0.759259	0.777778	-35
0.794118	0.7125	0.656242	0.759259	0.777778	-35
0.794118	0.725	0.656242	0.759259	0.777778	-35
0.794118	0.7375	0.656242	0.759259	0.777778	-35
0.794118	0.7375	0.656242	0.759259	0.777778	-35
0.794118	0.7375	0.656242	0.759259	0.777778	-35
0.794118	0.7375	0.656242	0.759259	0.777778	-35
0.794118	0.7375	0.656242	0.759259	0.777778	-35
0.794118	0.7375	0.656242	0.759259	0.777778	-35
0.794118	0.7375	0.656242	0.759259	0.777778	-35
0.794118	0.7375	0.656242	0.759259	0.777778	-36
0.794118	0.7375	0.656242	0.759259	0.777778	-36
0.794118	0.7375	0.656242	0.759259	0.8	-36
0.794118	0.7375	0.656242	0.759259	0.8	-36
0.794118	0.7375	0.656242	0.759259	0.8	-36
0.794118	0.7375	0.656242	0.768519	0.8	-36
0.794118	0.7375	0.656242	0.768519	0.8	-36
0.794118	0.725	0.656242	0.768519	0.8	-36
0.794118	0.725	0.656242	0.768519	0.8	-36
0.794118	0.725	0.656242	0.768519	0.8	-36
0.794118	0.725	0.656242	0.768519	0.8	-36
0.794118	0.725	0.656242	0.768519	0.8	-36
0.794118	0.725	0.656242	0.768519	0.8	-36
0.794118	0.725	0.656242	0.768519	0.8	-36
0.823529	0.7375	0.656242	0.768519	0.8	-36
0.823529	0.7375	0.656242	0.768519	0.8	-36
0.823529	0.7375	0.656242	0.768519	0.8	-36
0.823529	0.7375	0.656242	0.768519	0.8	-36
0.823529	0.75	0.656242	0.768519	0.8	-36
0.823529	0.75	0.666333	0.759259	0.8	-36
0.823529	0.75	0.666333	0.759259	0.8	-36
0.823529	0.75	0.666333	0.759259	0.8	-36
0.823529	0.75	0.666333	0.759259	0.8	-36
0.823529	0.75	0.666333	0.759259	0.8	-36
0.823529	0.75	0.676424	0.759259	0.8	-36
0.823529	0.75	0.676424	0.759259	0.8	-36
0.852941	0.75	0.676424	0.759259	0.8	-36
0.852941	0.75	0.676424	0.759259	0.8	-36
0.852941	0.75	0.676424	0.759259	0.8	-36
0.852941	0.75	0.676424	0.759259	0.8	-36
0.852941	0.75	0.676424	0.759259	0.8	-36
0.852941	0.75	0.676424	0.759259	0.8	-36
0.882353	0.75	0.676424	0.759259	0.8	-36
0.882353	0.75	0.676424	0.759259	0.8	-36
0.882353	0.75	0.676424	0.768519	0.8	-36
0.882353	0.75	0.676424	0.768519	0.8	-36
0.882353	0.75	0.676424	0.768519	0.8	-36
0.882353	0.75	0.676424	0.768519	0.8	-36
0.882353	0.75	0.676424	0.768519	0.8	-36
0.882353	0.75	0.676424	0.759259	0.8	-36
0.882353	0.75	0.676424	0.759259	0.8	-36
0.882353	0.75	0.676424	0.759259	0.8	-36
0.882353	0.75	0.686545	0.759259	0.8	-36
0.882353	0.75	0.686545	0.759259	0.8	-36
0.882353	0.75	0.686545	0.759259	0.8	-36
0.882353	0.75	0.686545	0.759259	0.8	-36
0.882353	0.75	0.686545	0.759259	0.8	-36
0.882353	0.75	0.686545	0.759259	0.8	-36
0.882353	0.75	0.696636	0.759259	0.8	-36
0.882353	0.75	0.696636	0.759259	0.8	-36
0.882353	0.75	0.696636	0.759259	0.8	-37
0.882353	0.75	0.696636	0.759259	0.8	-37
0.882353	0.75	0.696636	0.759259	0.8	-37
0.882353	0.75	0.696636	0.759259	0.8	-37
0.882353	0.75	0.696636	0.768519	0.8	-37
0.882353	0.75	0.696636	0.768519	0.8	-37
0.882353	0.75	0.696636	0.768519	0.8	-37
0.882353	0.75	0.696636	0.768519	0.8	-37
0.882353	0.75	0.696636	0.768519	0.8	-37
0.882353	0.75	0.696636	0.768519	0.8	-37
0.882353	0.75	0.706727	0.768519	0.8	-37
0.882353	0.775	0.706727	0.768519	0.8	-37
0.882353	0.775	0.716818	0.768519	0.8	-37
0.882353	0.775	0.716818	0.768519	0.8	-37
0.882353	0.775	0.716818	0.777778	0.8	-37
0.882353	0.775	0.716818	0.787037	0.8	-37
0.882353	0.775	0.716818	0.787037	0.8	-37
0.882353	0.775	0.716818	0.787037	0.8	-37
0.882353	0.775	0.716818	0.787037	0.822222	-37
0.882353	0.775	0.716818	0.787037	0.822222	-37
0.882353	0.775	0.716818	0.787037	0.822222	-37
0.882353	0.775	0.716818	0.787037	0.822222	-37
0.882353	0.775	0.716818	0.787037	0.822222	-37
0.882353	0.775	0.716818	0.787037	0.822222	-37
0.882353	0.775	0.716818	0.787037	0.822222	-37
0.882353	0.775	0.716818	0.787037	0.822222	-37
0.882353	0.775	0.716818	0.787037	0.822222	-37
0.882353	0.775	0.716818	0.787037	0.822222	-37
0.882353	0.7875	0.716818	0.787037	0.822222	-37
0.882353	0.7875	0.716818	0.787037	0.822222	-37
0.882353	0.7875	0.716818	0.787037	0.822222	-37
0.882353	0.7875	0.716818	0.787037	0.822222	-37
0.882353	0.7875	0.716818	0.787037	0.822222	-37
0.882353	0.7875	0.716818	0.787037	0.822222	-37
0.882353	0.7875	0.73703	0.796296	0.822222	-37
0.882353	0.7875	0.73703	0.796296	0.822222	-37
0.882353	0.7875	0.73703	0.796296	0.822222	-37
0.882353	0.7875	0.747152	0.805556	0.822222	-37
0.882353	0.7875	0.747152	0.805556	0.822222	-37
0.882353	0.7875	0.747152	0.814815	0.822222	-37
0.882353	0.7875	0.747152	0.814815	0.822222	-37
0.882353	0.8	0.747152	0.814815	0.822222	-37
0.882353	0.8	0.747152	0.814815	0.822222	-37
0.882353	0.8	0.747152	0.814815	0.822222	-37
0.882353	0.8	0.747152	0.814815	0.822222	-37
0.882353	0.8	0.747152	0.814815	0.822222	-37
0.882353	0.8	0.747152	0.814815	0.822222	-37
0.882353	0.8125	0.757273	0.814815	0.822222	-37
0.882353	0.8125	0.757273	0.814815	0.822222	-37
0.882353	0.825	0.757273	0.814815	0.822222	-37
0.911765	0.825	0.757273	0.814815	0.822222	-38
0.911765	0.825	0.757273	0.814815	0.822222	-38
0.911765	0.825	0.757273	0.814815	0.822222	-38
0.911765	0.825	0.767364	0.814815	0.822222	-38
0.911765	0.825	0.767364	0.814815	0.822222	-38
0.911765	0.825	0.767364	0.814815	0.822222	-38
0.911765	0.825	0.767364	0.814815	0.822222	-38
0.911765	0.825	0.767364	0.814815	0.822222	-38
0.911765	0.825	0.767364	0.814815	0.822222	-38
0.911765	0.825	0.767364	0.814815	0.822222	-38
0.911765	0.825	0.767364	0.814815	0.822222	-38
0.911765	0.825	0.767364	0.814815	0.822222	-38
0.911765	0.825	0.767364	0.814815	0.822222	-38
0.911765	0.825	0.767364	0.814815	0.822222	-38
0.911765	0.825	0.767364	0.814815	0.822222	-38
0.911765	0.825	0.767364	0.824074	0.822222	-38
0.911765	0.825	0.767364	0.824074	0.822222	-38
0.911765	0.825	0.767364	0.824074	0.822222	-38
0.911765	0.825	0.767364	0.824074	0.822222	-38
0.911765	0.825	0.777485	0.824074	0.822222	-38
0.911765	0.825	0.777485	0.824074	0.822222	-38
0.911765	0.825	0.777485	0.824074	0.822222	-38
0.911765	0.825	0.777485	0.824074	0.822222	-38
0.911765	0.825	0.777485	0.824074	0.822222	-38
0.911765	0.825	0.777485	0.814815	0.822222	-38
0.911765	0.825	0.777485	0.814815	0.822222	-38
0.911765	0.825	0.777485	0.814815	0.822222	-38
0.911765	0.825	0.787606	0.814815	0.822222	-38
0.911765	0.825	0.787606	0.814815	0.822222	-38
0.911765	0.825	0.787606	0.814815	0.822222	-38
0.911765	0.825	0.787606	0.814815	0.822222	-38
0.911765	0.825	0.787606	0.814815	0.822222	-38
0.911765	0.825	0.787606	0.814815	0.822222	-38
0.882353	0.825	0.787606	0.814815	0.822222	-38
0.911765	0.825	0.787606	0.814815	0.822222	-38
0.911765	0.825	0.787606	0.814815	0.822222	-38
0.911765	0.825	0.787606	0.814815	0.822222	-38
0.911765	0.825	0.787606	0.814815	0.822222	-38
0.911765	0.825	0.787606	0.814815	0.822222	-38
0.911765	0.825	0.787606	0.814815	0.822222	-38
0.911765	0.825	0.787606	0.814815	0.822222	-38
0.911765	0.825	0.787606	0.814815	0.822222	-38
0.911765	0.825	0.787606	0.814815	0.822222	-38
0.911765	0.825	0.787606	0.814815	0.822222	-38
0.911765	0.825	0.787606	0.824074	0.822222	-38
0.911765	0.825	0.787606	0.824074	0.822222	-38
0.911765	0.825	0.787606	0.824074	0.822222	-38
0.911765	0.825	0.797697	0.824074	0.822222	-38
0.911765	0.825	0.797697	0.824074	0.822222	-38
0.911765	0.825	0.797697	0.824074	0.822222	-38
0.911765	0.825	0.797697	0.824074	0.822222	-39
0.911765	0.825	0.797697	0.833333	0.822222	-39
0.911765	0.825	0.797697	0.833333	0.822222	-39
0.911765	0.825	0.797697	0.833333	0.822222	-39
0.911765	0.825	0.797697	0.833333	0.822222	-39
0.911765	0.825	0.797697	0.833333	0.822222	-39
0.911765	0.825	0.797697	0.842593	0.822222	-39
0.911765	0.825	0.797697	0.842593	0.822222	-39
0.911765	0.8375	0.807788	0.842593	0.822222	-39
0.911765	0.8375	0.82797	0.842593	0.822222	-39
0.911765	0.8375	0.82797	0.842593	0.844444	-39
0.911765	0.8375	0.82797	0.851852	0.844444	-39
0.911765	0.8375	0.838091	0.851852	0.844444	-39
0.911765	0.8375	0.838091	0.851852	0.844444	-39
0.911765	0.8375	0.838091	0.851852	0.866667	-39
0.911765	0.8375	0.848212	0.851852	0.866667	-39
0.911765	0.8375	0.848212	0.851852	0.866667	-39
0.911765	0.8375	0.848212	0.851852	0.866667	-39
0.911765	0.8375	0.848212	0.851852	0.866667	-39
0.911765	0.8375	0.848212	0.851852	0.866667	-39
0.911765	0.8375	0.848212	0.851852	0.866667	-39
0.911765	0.8375	0.848212	0.851852	0.844444	-39
0.911765	0.8375	0.848212	0.851852	0.844444	-39
0.911765	0.8375	0.848212	0.851852	0.844444	-39
0.911765	0.8375	0.848212	0.851852	0.844444	-39
0.911765	0.8375	0.848212	0.851852	0.844444	-39
0.911765	0.8375	0.848212	0.851852	0.844444	-39
0.911765	0.85	0.848212	0.861111	0.844444	-39
0.911765	0.85	0.848212	0.861111	0.844444	-39
0.911765	0.85	0.848212	0.861111	0.844444	-39
0.911765	0.85	0.848212	0.861111	0.866667	-39
0.911765	0.85	0.848212	0.861111	0.866667	-39
0.911765	0.85	0.848212	0.861111	0.866667	-39
0.911765	0.85	0.848212	0.87037	0.866667	-39
0.911765	0.85	0.848212	0.87037	0.866667	-39
0.911765	0.85	0.848212	0.87037	0.866667	-39
0.911765	0.85	0.848212	0.87037	0.866667	-39
0.911765	0.85	0.848212	0.87963	0.866667	-39
0.911765	0.85	0.848212	0.87963	0.866667	-39
0.911765	0.85	0.848212	0.87963	0.866667	-39
0.911765	0.85	0.848212	0.87963	0.866667	-39
0.911765	0.85	0.848212	0.87963	0.866667	-39
0.911765	0.85	0.848212	0.87963	0.866667	-39
0.911765	0.8625	0.848212	0.87963	0.866667	-39
0.911765	0.8625	0.848212	0.87963	0.866667	-39
0.911765	0.8625	0.848212	0.87963	0.866667	-39
0.882353	0.8625	0.848212	0.87963	0.866667	-39
0.882353	0.8625	0.848212	0.87963	0.866667	-39
0.882353	0.8625	0.848212	0.87037	0.866667	-39
[truncated: 1,001 more rows]
