# Supplementary material for: Piezo1 ion channels inherently function as independent mechanotransducers
Source: eLife. 2021 Oct 29;10:e70988. doi: 10.7554/eLife.70988 (PMC8555984; doi:10.7554/eLife.70988)
Supplement: Figure 3—source data 1. [file elife-70988-fig3-data1.xlsx]

## Sheet: Figure 3C-3D
	number of channels per cluster (proportions)
Cluster size	1	1.6	5
0	1	0.577562	0.0347482
1	0	0.295936	0.0900957
2	0	0.0970554	0.136808
3	0	0.0240345	0.177174
4	0	0.00440327	0.177799
5	0	0	0.144299
6	0	0	0.108614
7	0	0	0.0627341
8	0	0	0.0390137
9	0	0	0.017166
10	0	0	0.00676238

## Sheet: Figure 3E-F
	Fraction of patches
Channels	Cluster size = 1	Cluster size = 1.6	Cluster size = 5	wtNeuro2A
0	0.0615	0.137667	0.4681	0.145907
1	0.1635	0.166133	0.0417	0.156584
2	0.1793	0.148633	0.0457	0.142349
3	0.1747	0.137667	0.059	0.156584
4	0.1423	0.1154	0.058	0.113879
5	0.1016	0.0801667	0.0584	0.0782918
6	0.0654	0.0652667	0.0543	0.0391459
7	0.0439	0.0457	0.0417	0.0462633
8	0.0288	0.0321333	0.0348	0.0533808
9	0.0156	0.023	0.0276	0.0177936
10	0.009	0.0150667	0.022	0.0177936
11	0.0074	0.00956667	0.0166	0.00355872
12	0.0034	0.0079	0.0146	0.00711744
13	0.0018	0.0046	0.0094	0.0142349
14	0.0011	0.0037	0.0101	0
15	0.0003	0.003	0.0058	0.00355872
16	0.0002	0.000933333	0.0066	0
17	0.0002	0.000933333	0.0051	0
18	0	0.0008	0.0048	0.00355872
19	0	0.0008	0.0036	0
20	0	0.000533333	0.0025	0

## Sheet: Figure 3G-H
	Fraction of Patches
Nearest Neighbor Distance	Cluster size = 1	Cluster size = 1.6	Cluster size = 5
0 to 0.05	0.0131917	0.20568	0.623291
0.05 to 0.1	0.0376098	0.279137	0.305489
0.1 to 0.15	0.0608979	0.143761	0.0565559
0.15 to 0.2	0.0769146	0.0531139	0.00763356
0.2 to 0.25	0.092268	0.0289073	0.000880199
0.25 to 0.3	0.0965793	0.026081	0
0.3 to 0.35	0.0977216	0.0262189	0
0.35 to 0.4	0.0925014	0.028967	0
0.4 to 0.45	0.0856845	0.0277535	0
0.45 to 0.5	0.0776147	0.0274225	0
0.5 to 0.55	0.0669287	0.0254906	0
0.55 to 0.6	0.052693	0.0209771	0
0.6 to 0.65	0.0416876	0.0204253	0
0.65 to 0.7	0.0318737	0.0173554	0
0.7 to 0.75	0.0233127	0.0151646	0
0.75 to 0.8	0.0173187	0.0117235	0
0.8 to 0.85	0.0122091	0.00996343	0
0.85 to 0.9	0.00845053	0.00832133	0
0.9 to 0.95	0.00547811	0.00640799	0
0.95 to 1.0	0.00361113	0.00430922	0
