# Supplementary material for: Piezo1 ion channels inherently function as independent mechanotransducers
Source: eLife. 2021 Oct 29;10:e70988. doi: 10.7554/eLife.70988 (PMC8555984; doi:10.7554/eLife.70988)
Supplement: Figure 4—figure supplement 1—source data 1. [file elife-70988-fig4-figsupp1-data1.xlsx]

## Sheet: Figure 4- figure supplement 1B
	Counts
Peak current (pA)	Ramp	Step
0 to 5	19	4
5 to 10	20	6
10 to 15	15	6
15 to 20	24	3
20 to 25	22	5
25 to 30	17	8
30 to 35	12	7
35 to 40	5	5
40 to 45	2	2
45 to 50	2	6
50 to 55	0	4
55 to 60	0	6
60 to 65	0	8
65 to 70	0	9
70 to 75	0	3
75 to 80	1	7
80 to 85	0	6
85 to 90	0	5
90 to 95	0	5
95 to 100	1	7
100 to 105	0	2
105 to 110	0	4
110 to 115	0	4
115 to 120	0	4
120 to 125	0	2
125 to 130	0	2
130 to 135	0	2
135 to 140	0	1
140 to 145	0	2
145 to 150	0	0
150 to 155	0	1
155 to 160	0	1
160 to 165	0	1
165 to 170	0	0
170 to 175	0	0
175 to 180	0	0
180 to 185	0	1
185 to 190	0	0
190 to 195	0	0
195 to 200	0	0

## Sheet: Figure 4- figure supplement 1C
	Normalized Steady-state current as a function of step peak current
	0 to 10 pA	10 to 20 pA	20 to 30 pA	30 to 40 pA	40 to 50 pA	50 to 60 pA	60 to 70 pA	70 to 80 pA	80 to 90 pA	90 to 100 pA	100 to 110 pA	110 to 120 pA	120 to 130 pA	130 to 140 pA
	0.925457	0.626032	0.477549	0.635021	0.377226	0.613981	0.511328	0.449766	0.422243	0.445601	0.246775	0.358342	0.456213	0.775058
	0.71021	0.86523	0.226625	0.748168	0.458055	0.49142	0.193442	0.437417	0.572212	0.51843	0.233361	0.352658	0.451596	0.451045
	0.558189	0.85284	0.462217	0.698281	0.67431	0.39603	0.676646	0.491635	0.363	0.646697	0.524607	0.406313	0.549796	0.390603
	0.813372	0.785335	0.6871	0.610499	0.348631	0.434752	0.438595	0.396461	0.450933	0.344073	0.376331	0.725285	0.25398
	0.907966	0.657147	0.662787	0.661491	0.372748	0.60945	0.491067	0.584765	0.290659	0.281063	0.223443	0.508822
	0.844543	0.919976	0.769723	0.369664	0.213483	0.196571	0.152403	0.437602	0.680148	0.546054	0.457439	0.632225
	0.697816	0.766617	0.831219	0.808533	0.796005	0.600026	0.61687	0.418989	0.358463	0.512995		0.56409
	0.743332	0.804718	0.537186	0.736591	0.193058	0.532536	0.652074	0.600582	0.456672	0.508942		0.492807
	0.816686	0.884494	0.37321	0.704152		0.192762	0.575069	0.526662	0.471753	0.529311
	0.616566		0.479284	0.50208		0.602638	0.776041	0.511658	0.645361	0.338122
			0.808873	0.607405			0.453878		0.69588	0.595371
			0.492751	0.270706			0.57452			0.33638
			0.726464				0.436455
							0.290431
							0.598066
							0.536951
							0.447321
