# Supplementary material for: Piezo1 ion channels inherently function as independent mechanotransducers
Source: eLife. 2021 Oct 29;10:e70988. doi: 10.7554/eLife.70988 (PMC8555984; doi:10.7554/eLife.70988)
Supplement: Figure 4—figure supplement 2—source data 1. [file elife-70988-fig4-figsupp2-data1.xlsx]

## Sheet: Figure 4- figure supplement 2E
	Single channel current as a function of channel number
# channels	0 to 10	10 to 20	20 to 30	30 to 40	40 to 50	50 to 60	60 to 70	70 to 80	80 to 90	90 to 100	100 to 110	110 to 120	120 to 130	130 to 140	140 to 150	150 to 160	160 to 170	170 to 180	180 to 190	190 to 200	>200
	7.91325e-13	8.48575e-13	8.616e-13	9.4395e-13	8.53725e-13	9.58e-13	8.795e-13	8.703e-13	8.2525e-13	8.3925e-13	8.975e-13	8.87e-13	7.339e-13	9.404e-13	9.2025e-13	7.74667e-13	8.35667e-13	7.40667e-13	9.005e-13	9.8475e-13	8.12e-13
	8.2525e-13	7.82333e-13	9.1025e-13	9.29e-13	8.4575e-13	7.87825e-13	8.436e-13	7.9155e-13	7.79e-13	7.84175e-13	8.97333e-13	8.77175e-13	8.3975e-13	9.65e-13	9.0575e-13	9.7315e-13	8.974e-13	9.3675e-13	8.17667e-13	8.34e-13	7.9825e-13
	8.71333e-13		8.29767e-13	8.76433e-13	9.09e-13	8.285e-13	8.03333e-13	1.08225e-12	7.95675e-13	7.98375e-13	7.75275e-13	9.8275e-13	8.50075e-13	8.098e-13	8.684e-13		8.9725e-13	8.59e-13		7.554e-13	8.55e-13
			8.07333e-13		9.6376e-13	9.74e-13	8.306e-13	9.627e-13	8.21333e-13	8.45025e-13	8.3225e-13	8.5675e-13	8.83e-13	1.029e-12	9.4e-13		8.575e-13	8.9725e-13
					9.27233e-13	1.01226e-12	9.28e-13	9.0852e-13	8.57275e-13	7.995e-13	8.352e-13	7.1725e-13	9.395e-13	9.2875e-13	8.83333e-13		9.2825e-13
						8.9e-13	7.56125e-13	9.7e-13	9.01744e-13	8.28e-13	9.2125e-13	9.08325e-13	8.79e-13	8.99e-13
						9.2944e-13	8.335e-13	8.045e-13	8.8595e-13	8.68e-13	7.21367e-13	8.89667e-13		9.41667e-13
							9.27e-13	9.7455e-13	8.8935e-13	9.775e-13	8.028e-13	1.0315e-12		9.5725e-13
							8.9e-13	9.87e-13	8.81625e-13	8.155e-13	7.95e-13	9.045e-13
							8.592e-13	8.77e-13	9.1e-13	9.225e-13	9.9075e-13	8.65575e-13
							9.38667e-13	8.454e-13		8.2825e-13	8.61e-13	8.70625e-13
							8.573e-13	9.626e-13		8.89e-13	8.345e-13
										8.41667e-13	8.58667e-13
										8.88333e-13	9.55e-13
										7.9575e-13	9.56e-13
										9.79e-13	8.3197e-13
										9.72e-13	9.774e-13
										9.49e-13	9.065e-13

## Sheet: Figure 4- figure supplement 2F
	Single channel current as a function of channel number
# channels	0 to 10	10 to 20	20 to 30	30 to 40	40 to 50	50 to 60	60 to 70	70 to 80	80 to 90	90 to 100	100 to 110	110 to 120	120 to 130	130 to 140	140 to 150	150 to 160	160 to 170	170 to 180	180 to 190	190 to 200	>200
	1.72232e-12	2.0002e-12	1.85645e-12	1.90332e-12	1.81526e-12	1.91559e-12	1.99314e-12	1.92012e-12	2.01893e-12	1.84185e-12	1.86133e-12	1.80612e-12	1.93198e-12	1.88138e-12	1.91281e-12	1.85885e-12	1.76145e-12	1.93e-12	1.7399e-12	1.86488e-12	1.82147e-12
	1.96662e-12	1.96295e-12	1.91534e-12	2.00956e-12	1.82628e-12	1.82757e-12	1.80033e-12	1.90304e-12	1.50515e-12	1.90777e-12	1.76412e-12	1.80986e-12	1.82898e-12	1.79136e-12	1.82981e-12	1.86257e-12	1.86246e-12	1.8384e-12	1.69807e-12	1.9299e-12	1.69074e-12
	1.92479e-12		1.82848e-12	1.96152e-12	1.80957e-12	1.77755e-12	1.93445e-12	1.89833e-12	1.92943e-12	1.70383e-12	1.80935e-12	1.89265e-12	1.86192e-12	1.82789e-12	1.9426e-12		1.83439e-12	1.92902e-12		1.70485e-12	1.76938e-12
			1.87962e-12		2.0352e-12	1.90722e-12	1.7899e-12	1.88026e-12	1.94584e-12	1.78543e-12	1.77455e-12	1.88857e-12	1.88733e-12	1.90556e-12	1.87999e-12		1.82368e-12	1.69723e-12
					1.85688e-12	1.95232e-12	1.86938e-12	1.83898e-12	1.89008e-12	1.71172e-12	1.86267e-12	1.75238e-12	1.95848e-12	1.83039e-12	1.86847e-12		1.9761e-12
						1.87509e-12	1.68816e-12	1.85815e-12	1.81217e-12	1.67451e-12	1.78601e-12	1.92051e-12		1.79265e-12
						1.95937e-12	1.8526e-12	1.88423e-12	1.90207e-12	1.88045e-12	1.84034e-12	1.73926e-12		1.96076e-12
							2.04238e-12	1.98172e-12	1.90824e-12	1.99578e-12	1.8086e-12	1.92552e-12		2.00681e-12
							1.85442e-12	1.81561e-12	1.79902e-12	2.03535e-12	1.88523e-12	1.84479e-12
							1.90008e-12	1.8138e-12		2.14261e-12	1.82645e-12	1.87543e-12
							1.741e-12	1.79319e-12		1.88104e-12	1.90031e-12	1.88113e-12
								1.91971e-12		1.60512e-12	1.86754e-12
										1.89832e-12	1.89972e-12
										1.64404e-12	1.92461e-12
										1.8222e-12	1.84346e-12
										1.83695e-12	1.92582e-12
										1.47952e-12	1.78591e-12
										1.95828e-12
