# Supplementary material for: Piezo1 ion channels inherently function as independent mechanotransducers
Source: eLife. 2021 Oct 29;10:e70988. doi: 10.7554/eLife.70988 (PMC8555984; doi:10.7554/eLife.70988)
Supplement: Figure 4—figure supplement 3—source data 1. [file elife-70988-fig4-figsupp3-data1.xlsx]

## Sheet: Figure 4- figure supplement 3A
	Number of channels as a function of pipette size
Pipette resistance (Mohm)	3 to 3.5	3.5 to 4	4 to 4.5	4.5 to 5	5 to 5.5	5.5 to 6
	169.297	191.874	77.4915	113.757	74.7237	88.4503
	10.497	164.586	88.6807	197.287	101.183	19.5516
	41.2544	33.738	83.4204	62.5553	116.935	24.7376
	96.0999	83.3826	70.933	109.289	53.7762
	226.319	116.627	83.2388	9.68951	117.472
	145.07	88.0527	94.0796	135.118	108.797
	146.654	95.9892	76.5448	189.413	6.75333
	94.4346	110.359	136.168	55.5853	101.579
	54.369	98.5164	99.4828	88.8518	46.642
	41.601	148.401	102.797	67.5868	26.4858
	88.8941	127.131	30.1534	135.069	59.5938
	202.284	105.509	113.4	59.7779
	93.9348	60.1165	57.7544
	230.105	181.614	102.403
	98.3365	100.275	9.94452
	126.382	144.042	108.184
	192.464	106.712	65.2676
	135.443	121.066	43.2518
	139.05	126.258	36.8213
	174.363	131.923	176.792
	91.6657	104.218	77.9832
	66.6237	119.11	65.823
	98.9358	126.907	73.9016
	66.8069	28.8768	87.5745
	54.7997	166.596	117.203
	102.407	77.9865
	71.8357	71.5822
	95.4363	138.573
	99.9611	83.66
	93.4837	74.866
	93.3998	120.283
	104.186	109.766
	170.476	69.1925
	113.738	132.82
	160.776	101.43
	92.8175	154.353
	20.2372	176.154
	108.504	91.7111
	76.3592	144.451
	62.1413	102.757
	45.787	117.633
	92.1536	107.748
	78.0332	61.4099
	68.3387	115.521
	153.463	92.284
		61.2276
		164.059

## Sheet: Figure 4- figure supplement 3B
	Open Probability as a function of pipette size
Pipette resistance (Mohm)	3 to 3.5	3.5 to 4	4 to 4.5	4.5 to 5	5 to 5.5	5.5 to 6
	0.00813957	0.00167624	0.00248119	0.00272705	0.00340925	0.0023171
	0.00575577	0.00284727	0.00342135	0.00128191	0.0017199	0.00808385
	0.00248802	0.00774229	0.00356303	0.00360681	0.00448371	0.00837241
	0.00294904	0.00381942	0.00334312	0.00332319	0.00949617
	0.00125503	0.00226964	0.00371258	0.0106505	0.00209024
	0.00345068	0.00537749	0.00344066	0.00298198	0.00198992
	0.00227549	0.00325685	0.00410097	0.000701235	0.00268975
	0.0056133	0.00348522	0.001995	0.00443138	0.00564234
	0.00862848	0.003975	0.00295124	0.00307218	0.00840459
	0.00766385	0.00209844	0.00236226	0.00558535	0.00555296
	0.00429232	0.00269699	0.00823523	0.00216719	0.00342074
	0.0031077	0.00259383	0.00340654	0.00434929
	0.00147083	0.00527528	0.00431989
	0.00245967	0.00125013	0.00255736
	0.00271068	0.00457157	0.00246374
	0.00232849	0.00290855	0.00154497
	0.0029929	0.00363434	0.00362785
	0.00126884	0.00154282	0.00671368
	0.0028359	0.00287576	0.00627704
	0.00592234	0.00234293	0.00158927
	0.00196262	0.00409635	0.00358245
	0.00418911	0.00263851	0.00413318
	0.0049898	0.00265006	0.00555096
	0	0.000625411	0.00283076
	0.00594492	0.00380214	0.0041946
	0.00377644	0.00446795
	0.00376704	0.00161895
	0.00333157	0.00450856
	0.00389669	0
	0.00374392	0.00113236
	0.00402808	0.00371149
	0.00294201	0.00151543
	0.00368136	0.00258009
	0.00226827	0.0025109
	0.00145444	0.00332057
	0.00408127	0.00289649
	0.00573175	0.00297487
	0.00375115	0.00239927
	0.00528466	0.00202151
	0.00485688	0.00454029
	0.00465462	0.000501281
	0.00317355	0.00241115
	0.00248484	0.00317488
	0.00413443	0.00216121
	0.00268824	0.00357237

## Sheet: Figure 4- figure supplement 3C
	P50 as a function of pipette size
Pipette resistance (Mohm)	3 to 3.5	3.5 to 4	4 to 4.5	4.5 to 5	5 to 5.5	5.5 to 6
	-18.567	-24.721	-17.976	-19.95	-25.767	-22.173
	-14.891	-24.343	-24.583	-32.509	-23.744	-29.104
	-18.051	-17.886	-20.852	-18.587	-20.392	-17.047
	-25.948	-29.768	-18.73	-18.072	-27.931
	-17.698	-22.951	-23.288	-25.212	-25.063
	-13.223	-25.333	-23.22	-21.801	-25.263
	-19.783	-26.055	-18.978	-18.385	-23.121
	-18.557	-20.449	-30.267	-23.32	-21.489
	-15.023	-24.689	-32.46	-28.657	-29.405
	-19.392	-28.088	-21.297	-20.779	-23.725
	-23.863	-17.625	-21.131	-26.078	-26.398
	-20.56	-23.265	-19.592	-27.828
	-22.154	-20.981	-23.632
	-25.502	-16.567	-28.096
	-18.601	-18.879	-17.908
	-21.284	-20.326	-18.44
	-13.366	-20.042	-25.359
	-17.759	-29.279	-15.753
	-21.915	-33.516	-19.483
	-20.321	-18.494	-24.44
	-13.413	-26.793	-21.731
	-16.224	-28.382	-29.638
	-18.679	-24.175	-24.208
	-18.819	-22.472	-19.051
	-19.071	-30.18	-18.254
	-26.357	-51.12
	-16.813	-20.891
	-33.629	-20.643
	-22.669	-25.918
	-18.489	-25.344
	-25.156	-21.794
	-17.223	-25.916
	-22.538	-22.848
	-15.511	-23.942
	-22.724	-19.801
	-21.548	-24.33
	-19.292	-21.593
	-18.872	-19.315
	-18.692	-21.186
	-18.965	-28.136
	-20.128	-24.264
	-31.995	-25.442
	-20.517	-24.27
	-20.61	-29.642
	-23.422	-24.081
		-16.181
		-26.29
		-19.775

## Sheet: Figure 4- figure supplement 3D
	Slope as a function of pipette size
Pipette resistance (Mohm)	3 to 3.5	3.5 to 4	4 to 4.5	4.5 to 5	5 to 5.5	5.5 to 6
	-5.8429	-12.03	-6.0972	-5.8648	-6.7978	-6.859
	-2.7834	-7.1855	-8.0388	-8.1479	-9.5819	-11.976
	-5.1131	-4.0213	-5.3791	-4.9078	-8.2273	-3.4548
	-7.1431	-12.397	-7.0802	-6.9566	-9.2767
	-5.4253	-4.9032	-8.9722	-5.6717	-7.5369
	-4.9249	-6.1976	-6.5443	-8.8367	-8.2449
	-8.9136	-11.194	-5.7177	-4.6327	-12.034
	-6.437	-6.5534	-9.8175	-6.3411	-5.672
	-6.1453	-7.3343	-10.325	-9.4907	-8.8348
	-7.6773	-9.8814	-5.7196	-8.0745	-9.2965
	-9.8945	-4.735	-6.8381	-6.4319	-7.5277
	-6.7637	-5.2701	-6.2753	-7.9134
	-5.2065	-20.981	-5.0135
	-7.885	-4.6297	-9.259
	-5.2894	-6.0676	-3.8148
	-5.4813	-7.2633	-3.8459
	-3.6177	-5.7984	-8.2229
	-5.8739	-8.7162	-3.6398
	-8.4555	-8.9469	-6.7566
	-7.2223	-6.8691	-6.7757
	-3.568	-11.928	-7.2744
	-5.5671	-8.8727	-9.8914
	-6.7737	-8.4522	-8.9469
	-5.2572	-6.6898	-5.7312
	-8.0726	-7.1182	-4.6248
	-8.2419	-7.8703
	-6.7906	-10.384
	-9.4316	-5.9724
	-6.927	-10.251
	-8.2951	-5.7166
	-8.3743	-7.6124
	-5.4343	-6.7976
	-7.4761	-5.8335
	-4.8269	-7.8445
	-8.5475	-6.8874
	-6.133	-8.5472
	-6.9132	-8.8992
	-5.9188	-6.2346
	-6.0691	-6.1082
	-6.5885	-7.7833
	-5.6724	-8.7586
	-7.5203	-13.378
	-8.1534	-6.9446
	-7.6209	-8.1608
	-5.593	-9.7104
		-5.0488
		-9.3418
		-7.3509
