# Supplementary material for: Piezo1 ion channels inherently function as independent mechanotransducers
Source: eLife. 2021 Oct 29;10:e70988. doi: 10.7554/eLife.70988 (PMC8555984; doi:10.7554/eLife.70988)
Supplement: Figure 4—figure supplement 4—source data 1. [file elife-70988-fig4-figsupp4-data1.xlsx]

## Sheet: Figure 4- figure supplement 4B
	Fraction of Patches
Nearest Neighbor Distance	17 channels/um2	40 channels/um2
0 to 0.05	0.420463	0.587681
0.05 to 0.1	0.413118	0.358353
0.1 to 0.15	0.128729	0.0502091
0.15 to 0.2	0.0310347	0.00347315
0.2 to 0.25	0.0055297	0.000255444
0.25 to 0.3	0.00112587	0
