# Supplementary material for: Piezo1 ion channels inherently function as independent mechanotransducers
Source: eLife. 2021 Oct 29;10:e70988. doi: 10.7554/eLife.70988 (PMC8555984; doi:10.7554/eLife.70988)
Supplement: Figure 4—source data 1. [file elife-70988-fig4-data1.xlsx]

## Sheet: Figure 4C
Number of Channels	Count
0 to 10	3
10 to 20	2
20 to 30	4
30 to 40	3
40 to 50	5
50 to 60	7
60 to 70	12
70 to 80	12
80 to 90	10
90 to 100	18
100 to 110	18
110 to 120	11
120 to 130	6
130 to 140	8
140 to 150	5
150 to 160	2
160 to 170	5
170 to 180	4
180 to 190	2
190 to 200	3
200 to 210	1
210 to 220	0
220 to 230	1
230 to 240	1
240 to 250	0

## Sheet: Figure 4D
	Open probability as a function of channel number
# channels	0 to 10	10 to 20	20 to 30	30 to 40	40 to 50	50 to 60	60 to 70	70 to 80	80 to 90	90 to 100	100 to 110	110 to 120	120 to 130	130 to 140	140 to 150	150 to 160	160 to 170	170 to 180	180 to 190	190 to 200	>200
	0.00555296	0.00575577	0.00573175	0.00823523	0.00813957	0.00949617	0.00527528	0.00356303	0.00371258	0.00418911	0.00457157	0.00348522	0.00113236	0.00234293	0.00290855	0.00268824	0.00145444	0.00226827	0.00125013	0.00167624	0.00147083
	0.0106505	0.00808385	0.00837241	0.00774229	0.00766385	0.00862848	0.00357237	0.00446795	0.00381942	0.00297487	0.0017199	0.00340654	0.00154282	0.00151543	0.00332057	0.00258009	0.00216121	0.00196262	0.000701235	0.00126884	0.00125503
	0.00246374		0.00840459	0.00627704	0.00671368	0.00594492	0.00454029	0.00376704	0.00342135	0.00248484	0.00268975	0.00368136	0.00287576	0.00216719	0.00345068		0.00284727	0.0025109		0.00128191	0.00245967
			0.00265006		0.00465462	0.00443138	0.00485688	0.00413318	0.0041946	0.00317488	0.00255736	0.00272705	0.00232849	0.00298198	0.00227549		0.000625411	0.00158927
					0.00564234	0.00431989	0.00360681	0.00340925	0.00537749	0.00408127	0.00377644	0.00241115	0.00209844	0.0029929	0.00269699		0.00248802
						0.00342074	0.00362785	0.00450856	0.0023171	0.00294201	0.00289649	0.00226964		0.001995
						0.00434929	0.00555096	0.00528466	0.00334312	0.00374392	0.00236226	0.00448371		0.00161895
							0.00592234	0.00410097	0.00307218	0.0031077	0.00402808	0.00283076		0.0028359
							0	0.00248119	0.00429232	0.00344066	0.00409635	0.00209024
							0.00558535	0.00358245		0.0056133	0.00259383	0.00239927
							0.00413443	0.00380214		0.00389669	0.00363434	0.00263851
							0	0.00317355		0.00325685	0.00202151
										0.00294904	0.00154497
										0.00271068	0.00375115
										0.003975	0.00198992
										0.0049898	0.00332319
										0.00295124	0.00371149
										0.00333157

## Sheet: Figure 4E
	P50 as a function of channel number
# channels	0 to 10	10 to 20	20 to 30	30 to 40	40 to 50	50 to 60	60 to 70	70 to 80	80 to 90	90 to 100	100 to 110	110 to 120	120 to 130	130 to 140	140 to 150	150 to 160	160 to 170	170 to 180	180 to 190	190 to 200	>200
	-23.121	-14.891	-19.292	-21.131	-18.051	-27.931	-20.981	-18.73	-23.288	-13.413	-18.879	-20.449	-21.794	-18.494	-20.326	-23.422	-22.724	-22.538	-16.567	-24.721	-17.698
	-25.212	-29.104	-17.047	-17.886	-19.392	-15.023	-26.29	-20.891	-29.768	-19.315	-23.744	-19.592	-29.279	-23.942	-21.186	-24.33	-19.775	-20.321	-18.385	-13.366	-25.502
	-17.908		-23.725	-19.483	-15.753	-19.071	-24.27	-16.813	-20.852	-31.995	-19.801	-15.511	-33.516	-26.078	-13.223		-24.343	-21.593		-32.509	-29.642
			-22.472		-20.128	-23.32	-18.965	-24.208	-25.918	-16.181	-21.489	-19.95	-21.284	-21.801	-19.783		-30.18	-24.44
					-29.405	-23.632	-18.587	-25.767	-19.051	-21.548	-28.096	-24.081	-24.175	-17.759	-28.088		-18.567
						-26.398	-25.359	-25.344	-25.333	-25.156	-26.357	-22.951	-17.625	-30.267
						-27.828	-29.638	-18.692	-22.173	-18.489	-28.136	-20.392		-20.643
							-16.224	-18.978	-24.583	-22.154	-21.297	-18.254		-21.915
							-18.819	-17.976	-28.657	-23.22	-17.223	-25.063
							-20.779	-21.731	-23.863	-18.557	-26.793	-24.264
							-20.61	-51.12		-33.629	-23.265	-28.382
							-22.848	-20.517		-26.055	-20.042
										-25.948	-25.442
										-18.601	-18.44
										-24.689	-18.872
										-18.679	-25.263
										-32.46	-18.072
										-22.669	-25.916

## Sheet: Figure 4F
	slope as a function of channel number
# channels	0 to 10	10 to 20	20 to 30	30 to 40	40 to 50	50 to 60	60 to 70	70 to 80	80 to 90	90 to 100	100 to 110	110 to 120	120 to 130	130 to 140	140 to 150	150 to 160	160 to 170	170 to 180	180 to 190	190 to 200	>200
	-12.034	-2.7834	-6.9132	-6.8381	-5.1131	-9.2767	-20.981	-7.0802	-8.9722	-3.568	-6.0676	-6.5534	-7.6124	-6.8691	-7.2633	-5.593	-8.5475	-7.4761	-4.6297	-12.03	-5.4253
	-5.6717	-11.976	-3.4548	-4.0213	-7.6773	-6.1453	-9.3418	-10.384	-12.397	-6.2346	-9.5819	-6.2753	-8.7162	-7.8445	-6.1082	-8.5472	-7.3509	-7.2223	-4.6327	-3.6177	-7.885
	-3.8148		-9.2965	-6.7566	-3.6398	-8.0726	-6.9446	-6.7906	-5.3791	-7.5203	-6.8874	-4.8269	-8.9469	-6.4319	-4.9249		-7.1855	-8.8992		-8.1479	-8.1608
			-6.6898		-5.6724	-6.3411	-6.5885	-8.9469	-10.251	-5.0488	-5.672	-5.8648	-5.4813	-8.8367	-8.9136		-7.1182	-6.7757
					-8.8348	-5.0135	-4.9078	-6.7978	-5.7312	-6.133	-9.259	-9.7104	-8.4522	-5.8739	-9.8814		-5.8429
						-7.5277	-8.2229	-5.7166	-6.1976	-8.3743	-8.2419	-4.9032	-4.735	-9.8175
						-7.9134	-9.8914	-6.0691	-6.859	-8.2951	-7.7833	-8.2273		-5.9724
							-5.5671	-5.7177	-8.0388	-5.2065	-5.7196	-4.6248		-8.4555
							-5.2572	-6.0972	-9.4907	-6.5443	-5.4343	-7.5369
							-8.0745	-7.2744	-9.8945	-6.437	-11.928	-8.7586
							-7.6209	-7.8703		-9.4316	-5.2701	-8.8727
							-5.8335	-8.1534		-11.194	-5.7984
										-7.1431	-13.378
										-5.2894	-3.8459
										-7.3343	-5.9188
										-6.7737	-8.2449
										-10.325	-6.9566
										-6.927	-6.7976

## Sheet: Figure 4G
	Normalized Current as a function of number of channels
	0 to 20 channels
Pressure	average	error
0 mmHg	0.0311692	0.0314328
-5 mmHg	0.0263386	0.039076
-10 mmHg	0.0790736	0.0348484
-15 mmHg	0.276941	0.134257
-20 mmHg	0.441973	0.205646
-25 mmHg	0.582049	0.175698
-30 mmHg	0.647872	0.161417
-35 mmHg	0.661492	0.167183
-40 mmHg	0.735909	0.113284
-45 mmHg	0.74335	0.0689
-50 mmHg	0.719113	0.138704
-55 mmHg	0.764076	0.182664
-60 mmHg	0.82395	0.106288
-65 mmHg	0.910526	0.0683119
-70 mmHg	0.846885	0.119995
-75 mmHg	0.921896	0.0766818
-80 mmHg	0.969707	0.0316497
	20 to 40 channels
Pressure	average	error
0 mmHg	0.0169108	0.0195075
-5 mmHg	0.0225126	0.0139533
-10 mmHg	0.0554119	0.0507764
-15 mmHg	0.31257	0.0788737
-20 mmHg	0.513205	0.0846615
-25 mmHg	0.63973	0.114459
-30 mmHg	0.677243	0.113646
-35 mmHg	0.704551	0.104924
-40 mmHg	0.774793	0.0605479
-45 mmHg	0.828896	0.101818
-50 mmHg	0.815205	0.092931
-55 mmHg	0.90353	0.0906581
-60 mmHg	0.947854	0.0912023
-65 mmHg	0.888862	0.0728311
-70 mmHg	0.906928	0.0329849
-75 mmHg	0.904466	0.0575908
-80 mmHg	0.871778	0.0667699
	40 to 60 channels
Pressure	average	error
0 mmHg	0.0119089	0.0128041
-5 mmHg	0.0232195	0.0270778
-10 mmHg	0.0837398	0.0969418
-15 mmHg	0.254762	0.170058
-20 mmHg	0.463414	0.139083
-25 mmHg	0.57315	0.121235
-30 mmHg	0.659944	0.116231
-35 mmHg	0.746209	0.0825137
-40 mmHg	0.786925	0.0550448
-45 mmHg	0.7968	0.0344504
-50 mmHg	0.860176	0.0847223
-55 mmHg	0.875894	0.0606455
-60 mmHg	0.893834	0.0422041
-65 mmHg	0.911072	0.0611449
-70 mmHg	0.951361	0.0412005
-75 mmHg	0.959048	0.0506962
-80 mmHg	0.977035	0.0360753
	60 to 80 channels
Pressure	average	error
0 mmHg	0.00426237	0.00807651
-5 mmHg	0.0144176	0.0179263
-10 mmHg	0.101537	0.0856789
-15 mmHg	0.285344	0.126099
-20 mmHg	0.455563	0.147636
-25 mmHg	0.581757	0.137817
-30 mmHg	0.654357	0.154425
-35 mmHg	0.72339	0.162207
-40 mmHg	0.756822	0.143776
-45 mmHg	0.807558	0.115032
-50 mmHg	0.826384	0.0860845
-55 mmHg	0.873991	0.0899296
-60 mmHg	0.903691	0.0599081
-65 mmHg	0.908885	0.0535342
-70 mmHg	0.943706	0.0427874
-75 mmHg	0.95065	0.0491515
-80 mmHg	0.972791	0.0296567
	80 to 100 channels
Pressure	average	error
0 mmHg	0.00412398	0.00486638
-5 mmHg	0.0107401	0.011568
-10 mmHg	0.0727657	0.0733446
-15 mmHg	0.257429	0.120552
-20 mmHg	0.434881	0.125416
-25 mmHg	0.557756	0.123263
-30 mmHg	0.633599	0.0960456
-35 mmHg	0.713786	0.100043
-40 mmHg	0.764381	0.09648
-45 mmHg	0.811509	0.0978994
-50 mmHg	0.850023	0.0934007
-55 mmHg	0.887607	0.0837492
-60 mmHg	0.916898	0.0583425
-65 mmHg	0.921147	0.0536425
-70 mmHg	0.959561	0.0402621
-75 mmHg	0.946974	0.0434522
-80 mmHg	0.95941	0.0471046
	100 to 120 channels
Pressure	average	error
0 mmHg	0.00304083	0.00456187
-5 mmHg	0.0107353	0.00929953
-10 mmHg	0.0815955	0.0673929
-15 mmHg	0.269087	0.111115
-20 mmHg	0.467262	0.117088
-25 mmHg	0.590137	0.102607
-30 mmHg	0.680668	0.0905511
-35 mmHg	0.759645	0.0981437
-40 mmHg	0.798833	0.0847731
-45 mmHg	0.847569	0.0709653
-50 mmHg	0.887501	0.0705687
-55 mmHg	0.91446	0.0578431
-60 mmHg	0.927226	0.0505357
-65 mmHg	0.948764	0.0453086
-70 mmHg	0.954391	0.0296756
-75 mmHg	0.954724	0.0404405
-80 mmHg	0.956948	0.0331682
	120 to 140 channels
Pressure	average	error
0 mmHg	0.00320996	0.00410627
-5 mmHg	0.00907423	0.0106569
-10 mmHg	0.0740345	0.0578002
-15 mmHg	0.250358	0.132466
-20 mmHg	0.426283	0.135807
-25 mmHg	0.569684	0.117102
-30 mmHg	0.655444	0.110877
-35 mmHg	0.716881	0.106802
-40 mmHg	0.779618	0.0871783
-45 mmHg	0.818814	0.0686409
-50 mmHg	0.857183	0.0672498
-55 mmHg	0.877532	0.0314604
-60 mmHg	0.920756	0.043538
-65 mmHg	0.937156	0.0480038
-70 mmHg	0.963535	0.039432
-75 mmHg	0.954279	0.0328088
-80 mmHg	0.966371	0.0506636
	140 to 160 channels
Pressure	average	error
0 mmHg	0.000919617	0.00401264
-5 mmHg	0.0246977	0.0346991
-10 mmHg	0.129141	0.138314
-15 mmHg	0.32123	0.141274
-20 mmHg	0.485871	0.122922
-25 mmHg	0.618114	0.101277
-30 mmHg	0.701694	0.104457
-35 mmHg	0.765654	0.0665748
-40 mmHg	0.826389	0.103509
-45 mmHg	0.845738	0.0837286
-50 mmHg	0.887547	0.0619453
-55 mmHg	0.932137	0.0425018
-60 mmHg	0.95252	0.0387288
-65 mmHg	0.969784	0.0190222
-70 mmHg	0.959463	0.0282331
-75 mmHg	0.975836	0.0225279
-80 mmHg	0.94128	0.0589054
	160 to 180 channels
Pressure	average	error
0 mmHg	0.00141597	0.00243478
-5 mmHg	0.0169469	0.0169267
-10 mmHg	0.104139	0.0781244
-15 mmHg	0.26982	0.121321
-20 mmHg	0.417813	0.102341
-25 mmHg	0.549448	0.1026
-30 mmHg	0.664018	0.0835883
-35 mmHg	0.746457	0.0859895
-40 mmHg	0.836894	0.0640113
-45 mmHg	0.873663	0.0514915
-50 mmHg	0.883179	0.079995
-55 mmHg	0.931078	0.0282526
-60 mmHg	0.957705	0.0438965
-65 mmHg	0.95768	0.0423266
-70 mmHg	0.936961	0.0438957
-75 mmHg	0.958156	0.0375788
-80 mmHg	0.943434	0.0332086
	180 to 200 channels
Pressure	average	error
0 mmHg	0.000817843	0.00364049
-5 mmHg	0.0257604	0.0257694
-10 mmHg	0.161956	0.0973729
-15 mmHg	0.345898	0.212064
-20 mmHg	0.50831	0.237614
-25 mmHg	0.61976	0.206747
-30 mmHg	0.730642	0.210816
-35 mmHg	0.792158	0.192915
-40 mmHg	0.869042	0.148643
-45 mmHg	0.87898	0.112199
-50 mmHg	0.871251	0.0694594
-55 mmHg	0.902581	0.0804935
-60 mmHg	0.917784	0.0515784
-65 mmHg	0.929582	0.0302296
-70 mmHg	0.900303	0.0962435
-75 mmHg	0.932374	0.117182
-80 mmHg	0.902227	0.117903
	>200 channels
Pressure	average	error
0 mmHg	0.000760085	0.00106541
-5 mmHg	0.00440086	0.00391499
-10 mmHg	0.114198	0.0477891
-15 mmHg	0.334325	0.131235
-20 mmHg	0.459497	0.100017
-25 mmHg	0.634409	0.134839
-30 mmHg	0.72917	0.0993286
-35 mmHg	0.787561	0.102752
-40 mmHg	0.84675	0.0802641
-45 mmHg	0.90571	0.0597205
-50 mmHg	0.914838	0.0546414
-55 mmHg	0.935458	0.0172623
-60 mmHg	0.964549	0.0307179
-65 mmHg	0.959739	0.0225514
-70 mmHg	0.987594	0.0214873
-75 mmHg	0.927046	0.0206337
-80 mmHg	0.962971	0.0174432
