# Supplementary material for: Piezo1 ion channels inherently function as independent mechanotransducers
Source: eLife. 2021 Oct 29;10:e70988. doi: 10.7554/eLife.70988 (PMC8555984; doi:10.7554/eLife.70988)
Supplement: Figure 5—figure supplement 1—source data 1. [file elife-70988-fig5-figsupp1-data1.xlsx]

## Sheet: Figure 5- figure supplement 1A
Pipette Size	Surface Area (um2)
2.82	10.4679
2.83	6.43254
2.17	7.00981
5.18	2.28962
3	4.27516
2.66	3.63292
2.48	4.0634
3.3	3.8582
3.12	3.57529
3.39	2.9629
2.81	3.48819
2.86	3.84112
3.39	2.52805
2.05	5.81235
2.03	5.51933
2.77	4.35742
2.76	4.68176
3.07	3.25923
3.76	2.93604
2.1	5.8199
3.65	4.16376
4.04	2.47155
4.13	2.10217
2.17	6.71774
2.08	5.78272
