# Supplementary material for: Piezo1 ion channels inherently function as independent mechanotransducers
Source: eLife. 2021 Oct 29;10:e70988. doi: 10.7554/eLife.70988 (PMC8555984; doi:10.7554/eLife.70988)
Supplement: Figure 5—source data 1. [file elife-70988-fig5-data1.xlsx]

## Sheet: Figure 5C
	Current as a function of tension
Pressure (mmHg)	Current (pA)	Tension (mN/m)
0	4.00168e-13	0
-5	1.15962e-12	1.24105
-10	1.17158e-11	2.87007
-15	3.39625e-11	2.06687
-20	4.30365e-11	2.57828
-25	5.19518e-11	3.10302
-30	6.26831e-11	3.50728
-35	5.79732e-11	4.59775
-40	5.99764e-11	4.94806
-45	5.46413e-11	5.997
-50	6.57771e-11	6.30921
-55	6.34542e-11	6.72793
-60	6.34916e-11	8.31068
-65	6.94764e-11	8.90823
-70	6.637e-11	9.59348

## Sheet: Figure 5D
Channel density (channels/um2)	T50 (mN/m)
5.08243	2.1613
25.4254	2.487
21.983	2.8939
33.2187	2.4123
8.10524	1.4474
24.7013	2.4598
24.6754	3.4528
25.8799	2.0301
49.8227	2.0012
20.0853	2.7925
34.5853	2.1393
19.1539	2.1963
62.3228	2.7402
26.9573	3.5555
32.7547	3.4319
24.6639	3.1971
3.5375	2.8562
45.6141	2.4377
41.5589	2.8274
9.4216	2.7618
20.6318	2.7352
11.3069	3.0161
73.553	1.9133
11.2212	2.4847
43.6857	2.2549

## Sheet: Figure 5E
Channel density (channels/um2)	Slope (mN/m)
5.08243	0.21619
25.4254	0.65675
21.983	0.66247
33.2187	0.83211
8.10524	0.1635
24.7013	0.77692
24.6754	1.1508
25.8799	0.30163
49.8227	0.29676
20.0853	1.2128
34.5853	0.22868
19.1539	0.86845
62.3228	0.58224
26.9573	0.80332
32.7547	0.6809
24.6639	0.73325
3.5375	0.69155
45.6141	0.66968
41.5589	0.68676
9.4216	0.80036
20.6318	0.51421
11.3069	0.31836
73.553	0.63034
11.2212	0.70723
43.6857	0.72178

## Sheet: Figure 5F
	0 to 10 channels/um2			10 to 20 channels/um2			20 to 30 channels/um2			30 to 40 channels/um2			40 to 50 channels/um2			>50 channels/um2
	Normalized current	Tension		Normalized current	Tension		Normalized current	Tension		Normalized current	Tension		Normalized current	Tension		Normalized current	Tension
	0.015	0		0.017	0		-0.001	0		0.013	0		-0.001	0		0.003	0
	0.014	1.45578		0.012	2.41051		0.003	0.937273		0.009	0.640594		0.003	0.758384		0.004	4.26314
	0.519	2.38848		0.239	1.81544		0.166	2.04048		0.234	1.40188		0.044	1.41252		0.102	2.53819
	0.748	2.36801		0.542	2.03431		0.346	2.73347		0.634	1.5248		0.234	1.65401		0.361	3.97156
	0.822	4.25809		0.592	2.74207		0.527	3.50169		0.728	3.40733		0.623	3.95125		0.597	2.5239
	0.929	7.66337		0.659	3.29378		0.678	4.89218		0.74	2.9316		0.712	2.62117		0.731	3.24757
	0.891	8.29359		0.763	3.52114		0.692	4.6941		0.773	3.22452		0.818	3.14843		0.824	3.29287
	1	11.431		0.768	4.73467		0.779	5.41251		0.935	3.59221		0.827	4.78384		0.91	4.02111
	0.808	9.23495		0.839	5.02071		0.838	7.62344		0.842	8.14775		0.86	4.76515		0.876	4.09228
	0.845	12.138		0.84	6.08986		0.876	6.37369		0.855	10.0571		0.946	6.62894		0.975	4.2569
	0.833	17.0314		0.855	6.69611		0.823	7.11391		0.909	6.16143					0.936	4.80899
	0.82	15.2878		0.862	7.64709		1	7.71421		0.841	9.37606		-0.001	0		0.949	3.93065
	0.728			0.904	7.61619		0.905	8.40526		0.946	9.36564		0.036	0.747529		0.921	6.39912
				1	7.05002		0.906			0.851	12.735		0.224	1.89067		0.961	7.66966
	0.013	0		0.947	8.53573					1	10.9476		0.435	2.26226		1	6.96686
	0.009	0.640594					0.003	0					0.562	2.8605
	0.234	1.40188		0.024	0		0.006	0.575089		0.003	0		0.657	3.94964		0.003	0
	0.634	1.5248		0.033	1.20698		0.149	1.09988		0.019	1.17941		0.749	3.78004		0.011	1.00933
	0.728	3.40733		0.08	1.4165		0.429	1.50789		0.157	2.11335		0.82	3.17036		0.12	1.08397
	0.74	2.9316		0.3	3.11554		0.677	2.5555		0.48	1.98223		0.816	3.95566		0.308	1.16701
	0.773	3.22452		0.553	4.32085		0.704	2.56237		0.609	2.23867		0.869	5.03264		0.507	1.57055
	0.935	3.59221		0.778	4.15652		0.838	3.04522		0.754	2.29756		0.85	4.81641		0.605	2.33136
	0.842	8.14775		0.897	3.34865		0.884	4.26372		0.863	3.01272		0.918	5.21405		0.764	2.81727
	0.855	10.0571		0.999	4.04443		0.876	3.59839		0.849	3.79993		0.913	7.13127		0.746	3.38713
	0.909	6.16143		0.795	4.56503		0.973	3.59073		0.954	4.13019		0.882	7.77584		0.78	2.81472
	0.841	9.37606		0.817	6.69826		0.899	5.17486		0.905	5.21787		1	6.72875		0.891	5.36006
	0.946	9.36564		0.848	7.72517		0.938	5.37093		0.933	10.2395					0.932	6.05466
	0.851	12.735		0.797	9.35419		0.938	6.38491		0.987	5.56363		0.003	0		0.995	7.10096
	1	10.9476		1	7.87671		1			0.976	6.0226		0.003	0.799815		0.982	9.43915
				0.959	6.6614					0.976	7.18415		0.049	1.72527		1	6.82053
	0.016	0		1	9.42872		0.01	0		1	7.34053		0.279	1.8315
	0.083	1.31714					0	1.09488					0.397	2.79667
	0.277	2.34259		0.006	0		0.204	1.65466		-0.001	0		0.454	4.73956
	0.327	2.47779		0.017	1.24105		0.406	1.96241		0.089	2.2608		0.604	3.38959
	0.488	3.68203		0.169	2.87007		0.583	3.71943		0.311	3.65059		0.62	3.62009
	0.767	3.54419		0.489	2.06687		0.664	2.94369		0.518	3.23988		0.765	4.23457
	0.593	3.71524		0.619	2.57828		0.807	3.48987		0.618	3.9542		0.808	4.11206
	0.749	4.24755		0.748	3.10302		0.735	5.06795		0.694	4.00251		0.762	3.66661
	0.949	4.23246		0.902	3.50728		0.829	4.66003		0.776	4.89191		0.894	3.67447
	0.674	6.91493		0.834	4.59775		0.841	5.87899		0.805	4.68583		0.982	7.37373
	0.599	5.20525		0.863	4.94806		0.847	5.08482		0.778	5.28316		0.951	4.70344
	0.893	5.0953		0.786	5.997		0.877	4.59387		0.872	7.30549		1	5.99021
	0.972	5.76054		0.947	6.30921		0.962	5.804		0.838	8.35937
	1	6.37778		0.913	6.72793		0.98	8.3375		0.908	8.99744		0	0
	0.895	7.45744		0.914	8.31068		1	11.1109		0.81	9.8534		0.044	1.66524
				1	8.90823					1	9.44904		0.283	1.69001
	0.002	0		0.955	9.59348		0.009	0					0.489	2.07203
	0.044	0.853981					0.151	2.3535					0.566	2.0925
	0.153	1.99793					0.334	2.65287					0.677	2.9668
	0.446	3.77327					0.535	3.10087					0.683	3.48858
	0.637	3.64312					0.569	4.34557					0.789	3.95678
	0.768	3.01408					0.675	4.59362					0.824	5.35775
	0.788	3.7794					0.799	4.29678					0.817	5.35813
	0.802	5.33841					0.816	5.84949					0.869	6.24688
	0.887	6.32028					0.774	6.03462					0.891	7.15884
	0.865	6.31813					0.862	5.47018					0.987	6.98167
	0.909	5.38064					0.986	6.86431					0.957	8.3347
	0.87	6.15751					1	9.65711					1	9.20604
	1	6.38049					0.994	12.9668
	0.95	6.40789
	0.885	11.1327					0.006	0
							0.001	1.61742
							0.499	1.83505
							0.636	2.29842
							0.785	2.8647
							0.849	2.63462
							0.932	3.62238
							0.94	10.1639
							0.982	8.69517
							0.963	6.77134
							0.901	9.20996
							0.919	5.81341
							1	11.2163
							0.967
							0.005	0
							0.087	1.37533
							0.404	2.01157
							0.471	4.67315
							0.675	3.37063
							0.614	4.56385
							0.678	4.25545
							0.791	6.24978
							0.83	5.48194
							0.861	5.57409
							0.859	6.66054
							0.868	7.7155
							0.001	0
							0.008	1.71232
							0.113	2.42416
							0.383	2.64287
							0.525	3.72824
							0.682	4.72076
							0.838	5.15387
							0.816	4.94833
							0.906	5.42223
							0.892	6.12855
							0.915	6.03515
							1	5.2296
							0.94	6.20038
							0.956	8.51493
							0.98	9.05407
							0.002	0
							0	1.74219
							0.027	1.40876
							0.281	2.65287
							0.47	2.90973
							0.577	3.97704
							0.62	3.43409
							0.749	4.36115
							0.87	4.76149
							0.793	6.16724
							0.822	5.53594
								5.20879
							0.999	8.61698
							0.952	7.59561
							1	9.06009
							0.018	0
							0.163	2.62616
							0.404	2.91661
							0.608	2.77265
							0.698	3.64678
							0.8	3.63823
							0.872	2.80421
							0.84	3.64781
							0.879	3.63092
							0.921	3.963
							0.906	5.89932
							1	6.26519
							0.986	6.82676
							0.993	7.19248
